# Supplementary material
Source: publisher figshare collection journal article supplement (https://gsajournals.figshare.com/ndownloader/files/30838336)
Supplement: Supplementary file 2 [file 30838336]

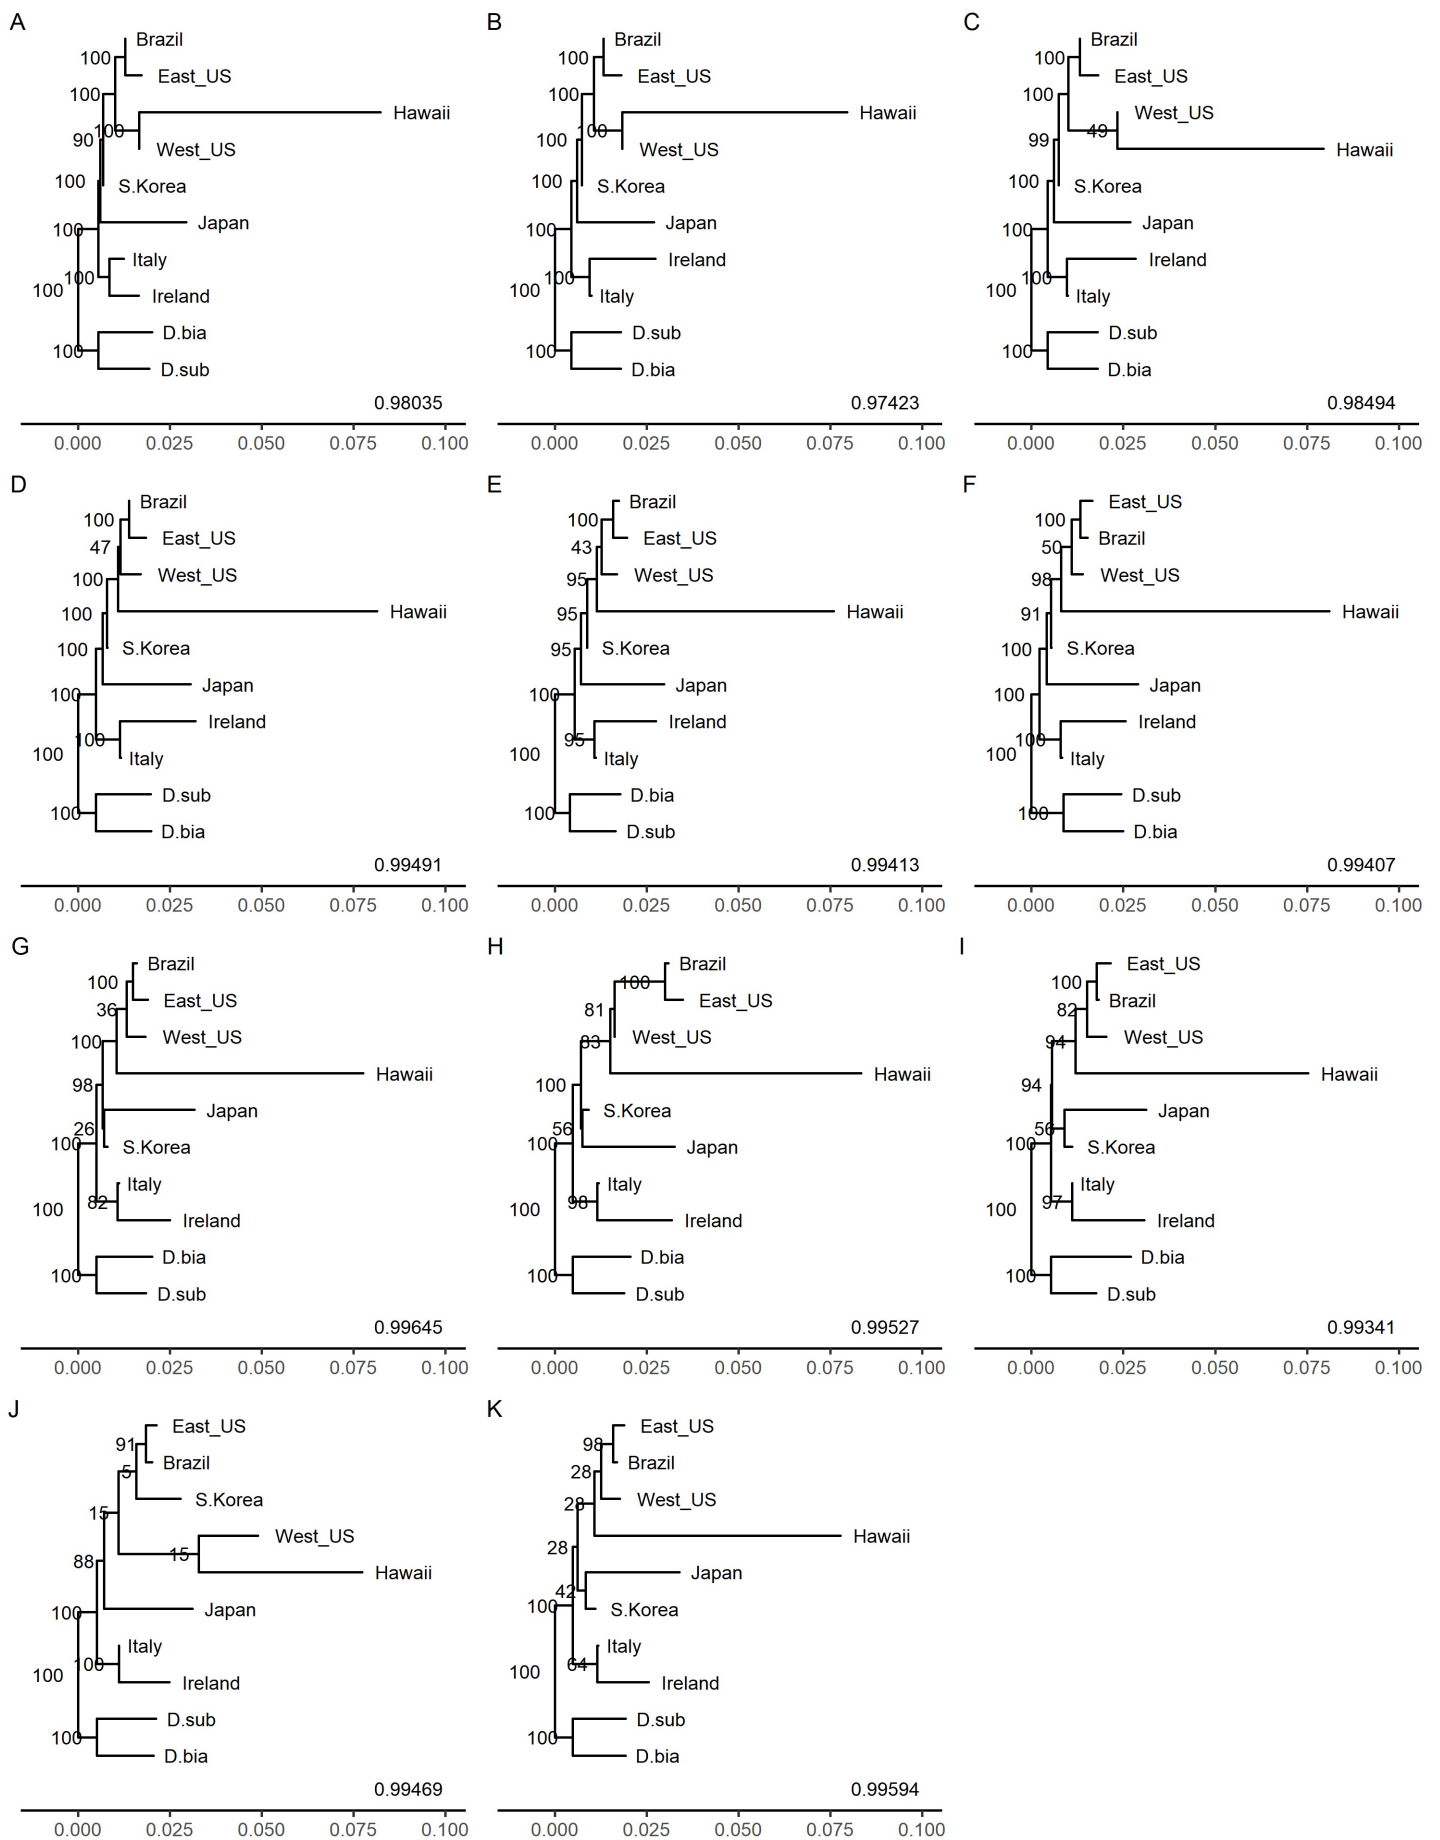

**Figure S7: Trees inferred by treemix with 0 to 10 migration edges (ordered from A-K).** Migration edges have not been plotted for readability; please see Table S5 for migration edge information. Bootstrap replicate values label each branch from 100 bootstrapped runs. X-axis measures genetic drift. Fraction variance of the data captured by the model is indicated in bottom right of each plot. Labels "D.sub" and "D.bia" stand for *D. subpulchrella* and *D. biarmipes*, respectively.
