# Supplementary material
Source: publisher figshare collection journal article supplement (https://gsajournals.figshare.com/ndownloader/files/30838336)
Supplement: Supplementary file 3 [file 30838336]

Archive with 31 entries (28 files):
- G3-2021-402773_SuppMaterials/
- G3-2021-402773_SuppMaterials/Figure S8.pdf
- __MACOSX/
- __MACOSX/G3-2021-402773_SuppMaterials/
- __MACOSX/G3-2021-402773_SuppMaterials/._Figure S8.pdf
- G3-2021-402773_SuppMaterials/Table S1.xlsx
- __MACOSX/G3-2021-402773_SuppMaterials/._Table S1.xlsx
- G3-2021-402773_SuppMaterials/.DS_Store
- __MACOSX/G3-2021-402773_SuppMaterials/._.DS_Store
- G3-2021-402773_SuppMaterials/Table S5.xlsx
- __MACOSX/G3-2021-402773_SuppMaterials/._Table S5.xlsx
- G3-2021-402773_SuppMaterials/Table S4.xlsx
- __MACOSX/G3-2021-402773_SuppMaterials/._Table S4.xlsx
- G3-2021-402773_SuppMaterials/Figure S1.pdf
- __MACOSX/G3-2021-402773_SuppMaterials/._Figure S1.pdf
- G3-2021-402773_SuppMaterials/Figure S2.pdf
- __MACOSX/G3-2021-402773_SuppMaterials/._Figure S2.pdf
- G3-2021-402773_SuppMaterials/Table S3.xlsx
- __MACOSX/G3-2021-402773_SuppMaterials/._Table S3.xlsx
- G3-2021-402773_SuppMaterials/Figure S3.pdf
- __MACOSX/G3-2021-402773_SuppMaterials/._Figure S3.pdf
- G3-2021-402773_SuppMaterials/Figure S7.pdf
- __MACOSX/G3-2021-402773_SuppMaterials/._Figure S7.pdf
- G3-2021-402773_SuppMaterials/Table S2.xlsx
- __MACOSX/G3-2021-402773_SuppMaterials/._Table S2.xlsx
- G3-2021-402773_SuppMaterials/Figure S6.pdf
- __MACOSX/G3-2021-402773_SuppMaterials/._Figure S6.pdf
- G3-2021-402773_SuppMaterials/Figure S4.pdf
- __MACOSX/G3-2021-402773_SuppMaterials/._Figure S4.pdf
- G3-2021-402773_SuppMaterials/Figure S5.pdf
- __MACOSX/G3-2021-402773_SuppMaterials/._Figure S5.pdf
