# Supplementary material
Source: publisher figshare collection journal article supplement (https://gsajournals.figshare.com/ndownloader/files/30838336)
Supplement: Supplementary file 3 [file 30838336 › G3-2021-402773_SuppMaterials/Figure S1.pdf]

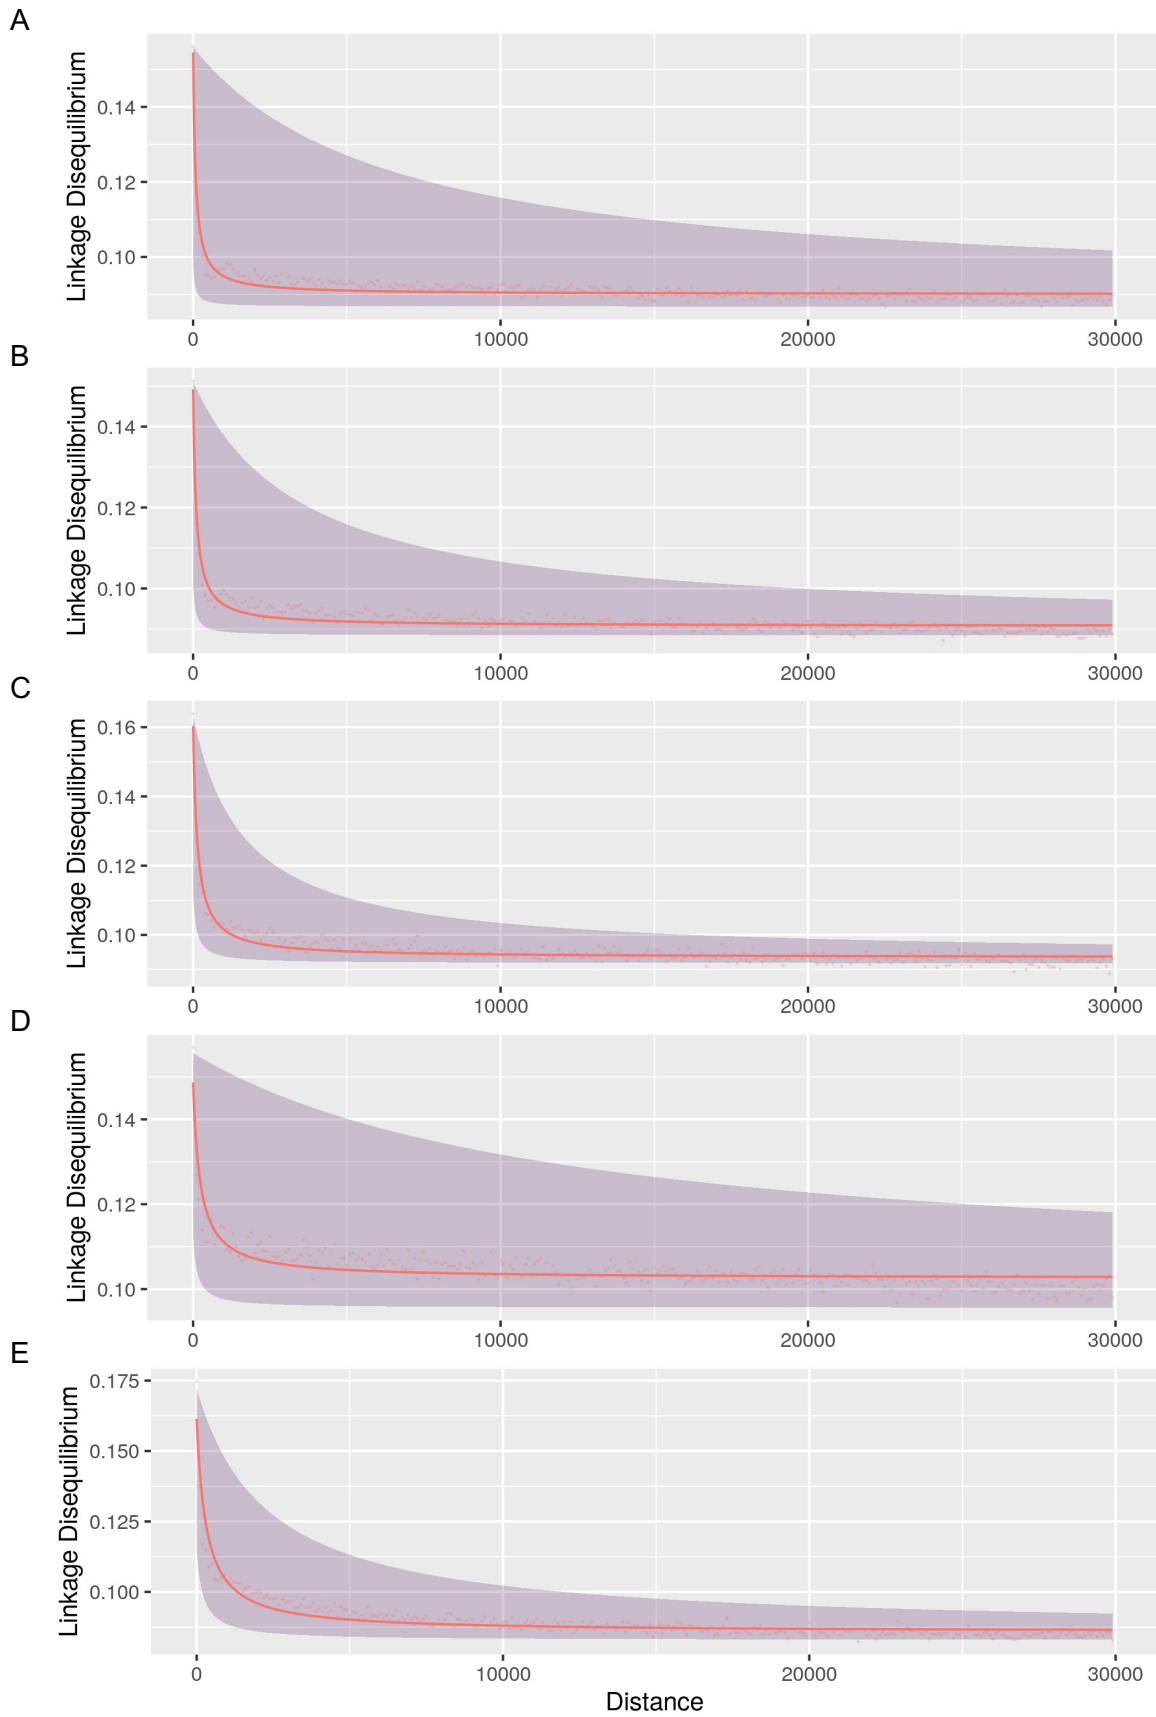

**Figure S1: Linkage disequilibrium decay in largest contigs for all samples.** Linkage disequilibrium measured by  $r^2$  measured pairwise for each SNP within 100kb of each other (0-30kb shown in plot). 95% confidence shaded intervals displayed based on 100 bootstrap replicates. A 1% subsample of the  $r^2$  values was used to fit the model of decay. **(A-E)** display results from contigs 1, 2, 3, 4, and 5-6, respectively, which span chromosomes X, 2, and 3, based on homology with *D. melanogaster*.
