# Supplementary material
Source: publisher figshare collection journal article supplement (https://gsajournals.figshare.com/ndownloader/files/30838336)
Supplement: Supplementary file 3 [file 30838336 › G3-2021-402773_SuppMaterials/Figure S2.pdf]

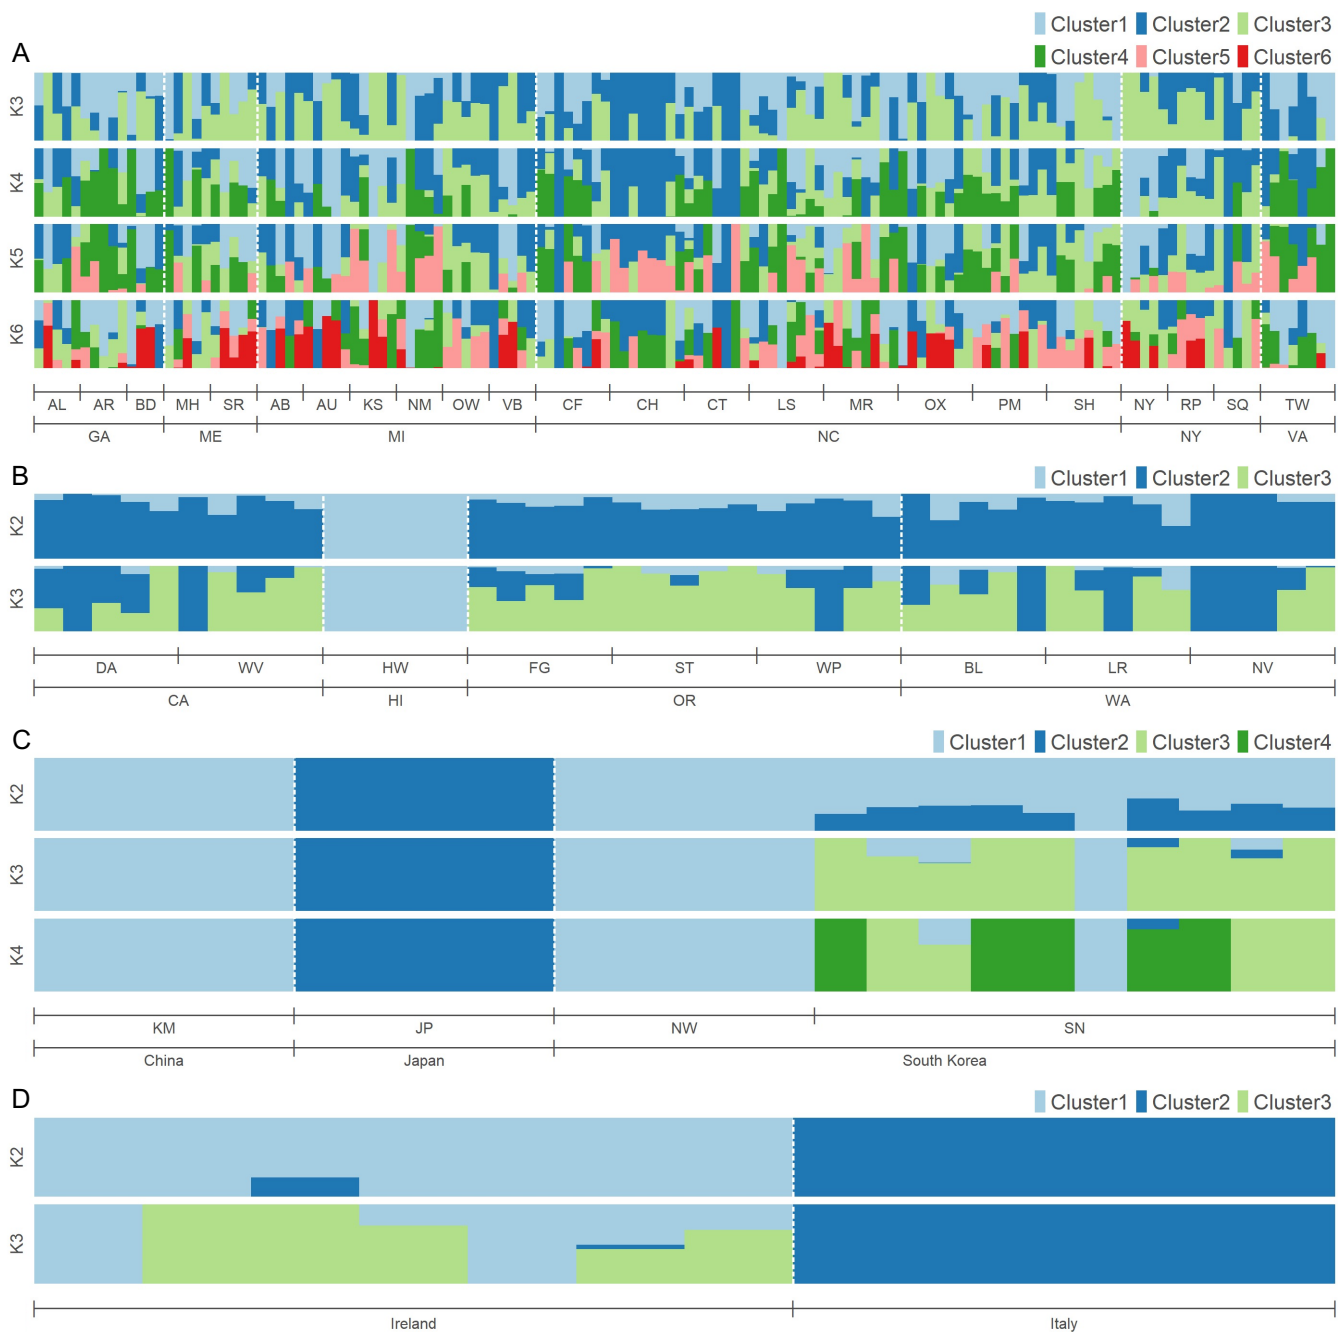

**Figure S2: Admixture proportions estimated for each region individually.** Samples are labeled by location code, followed by U.S. state abbreviation or country. Brazil not plotted as only one location was sampled. **(A)** Eastern U.S. samples, 182,786 sites used. **(B)** Western U.S. samples (including Hawaii), 136,929 sites used. **(C)** Asian samples, 97,134 sites used. **(D)** European samples, 77,645 sites used.
