# Supplementary material
Source: publisher figshare collection journal article supplement (https://gsajournals.figshare.com/ndownloader/files/30838336)
Supplement: Supplementary file 3 [file 30838336 › G3-2021-402773_SuppMaterials/Figure S3.pdf]

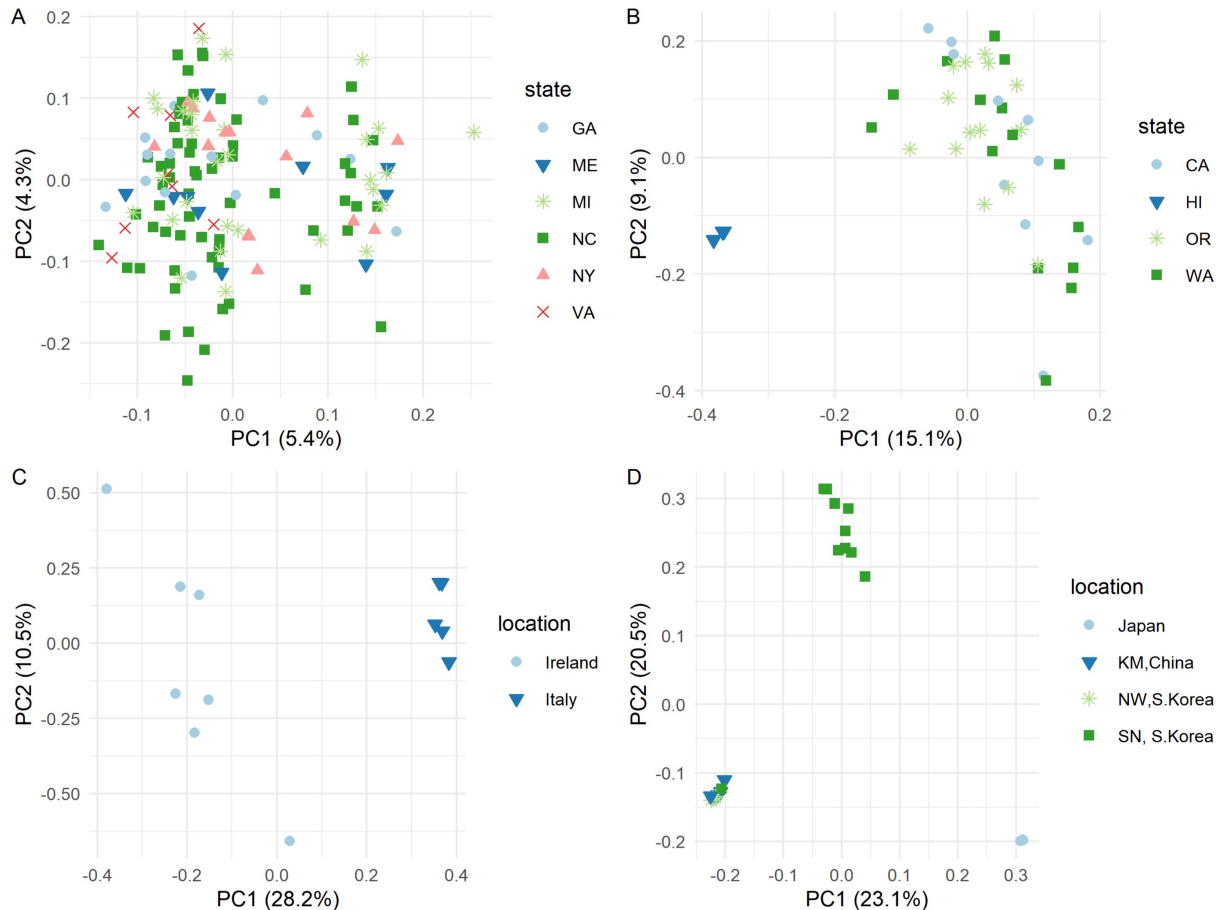

**Figure S3: PCA calculated for each region individually.** Percent variance captured by each principal component indicated in axis labels. **(A)** Eastern U.S. samples, 183,243 sites used. **(B)** Western U.S. samples, (including Hawaii), 139,075 sites used. **(C)** European samples, 90,624 sites used. **(D)** Asian samples, 103,312 sites used.
