# Supplementary material
Source: publisher figshare collection journal article supplement (https://gsajournals.figshare.com/ndownloader/files/30838336)
Supplement: Supplementary file 3 [file 30838336 › G3-2021-402773_SuppMaterials/Figure S4.pdf]

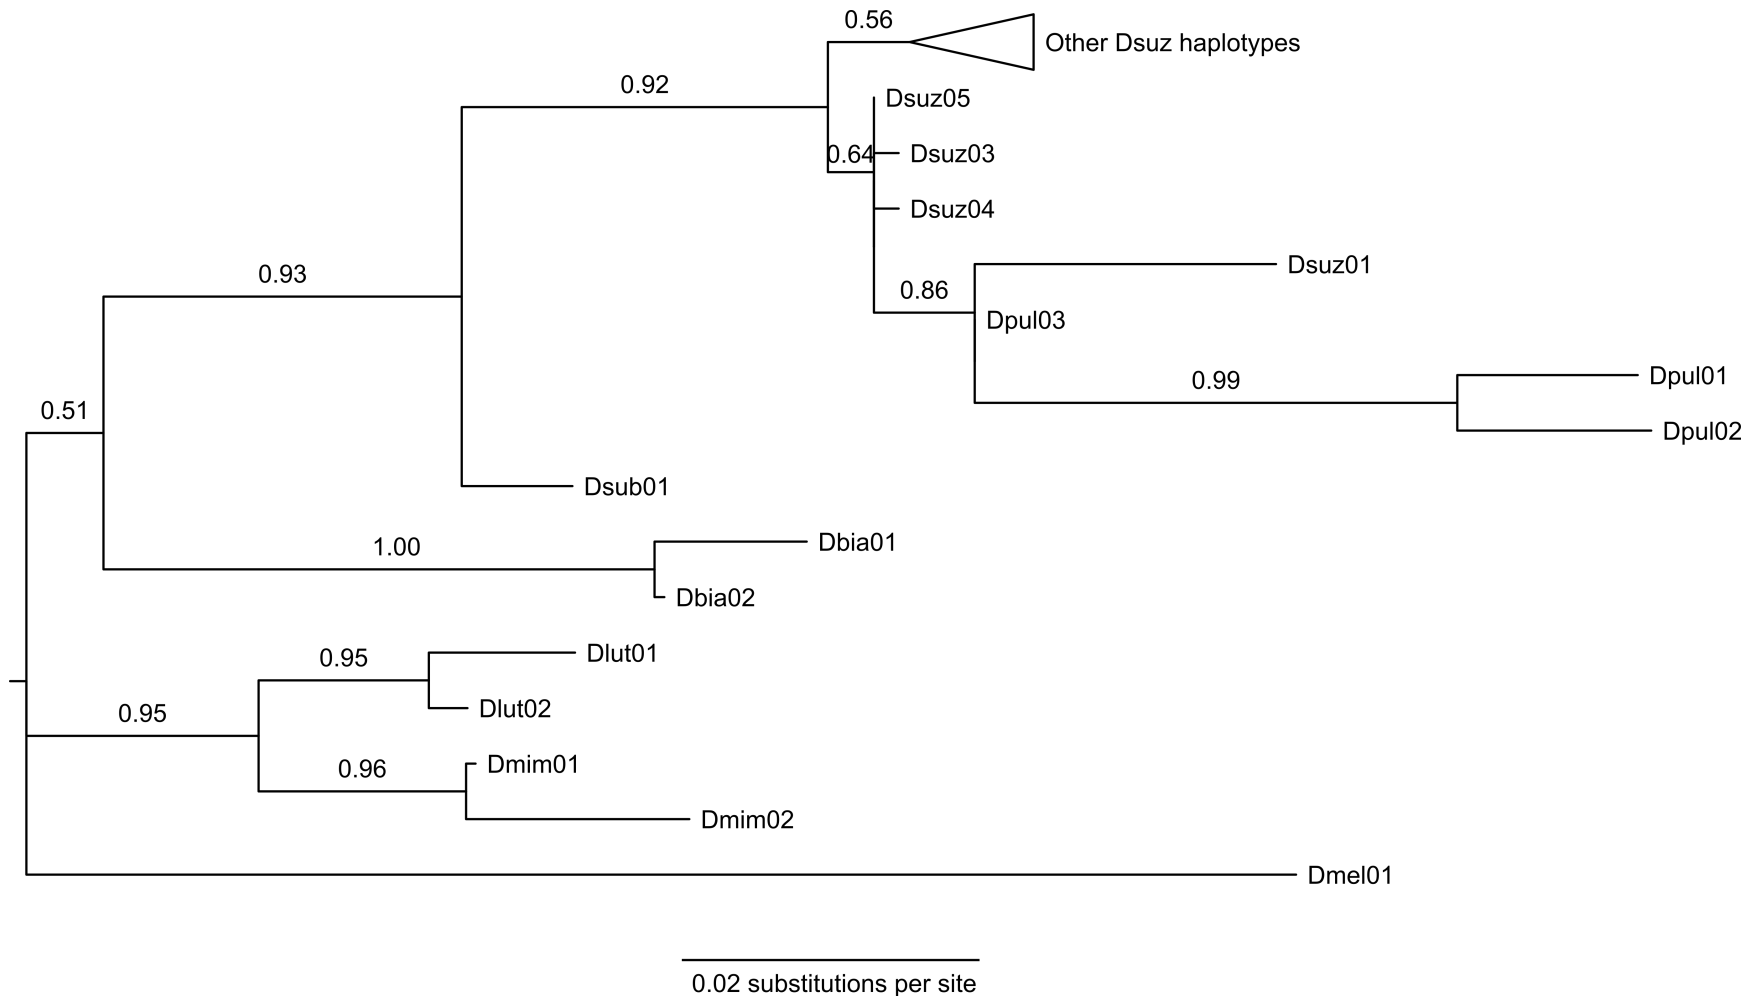

**Figure S4: Phylogenetic tree using COX2 gene.** Maximum likelihood tree of COX2 rooted on *D. melanogaster* (Dmel01) using the Tamura 3-parameter model + G, with bootstrap fractions greater than 0.5 from 500 replicate runs displayed next to branch points. Branch lengths measure number of substitutions per site. 70 variable sites were analyzed from a total of 720 positions in the alignment.
