# Supplementary material
Source: publisher figshare collection journal article supplement (https://gsajournals.figshare.com/ndownloader/files/30838336)
Supplement: Supplementary file 3 [file 30838336 › G3-2021-402773_SuppMaterials/Figure S5.pdf]

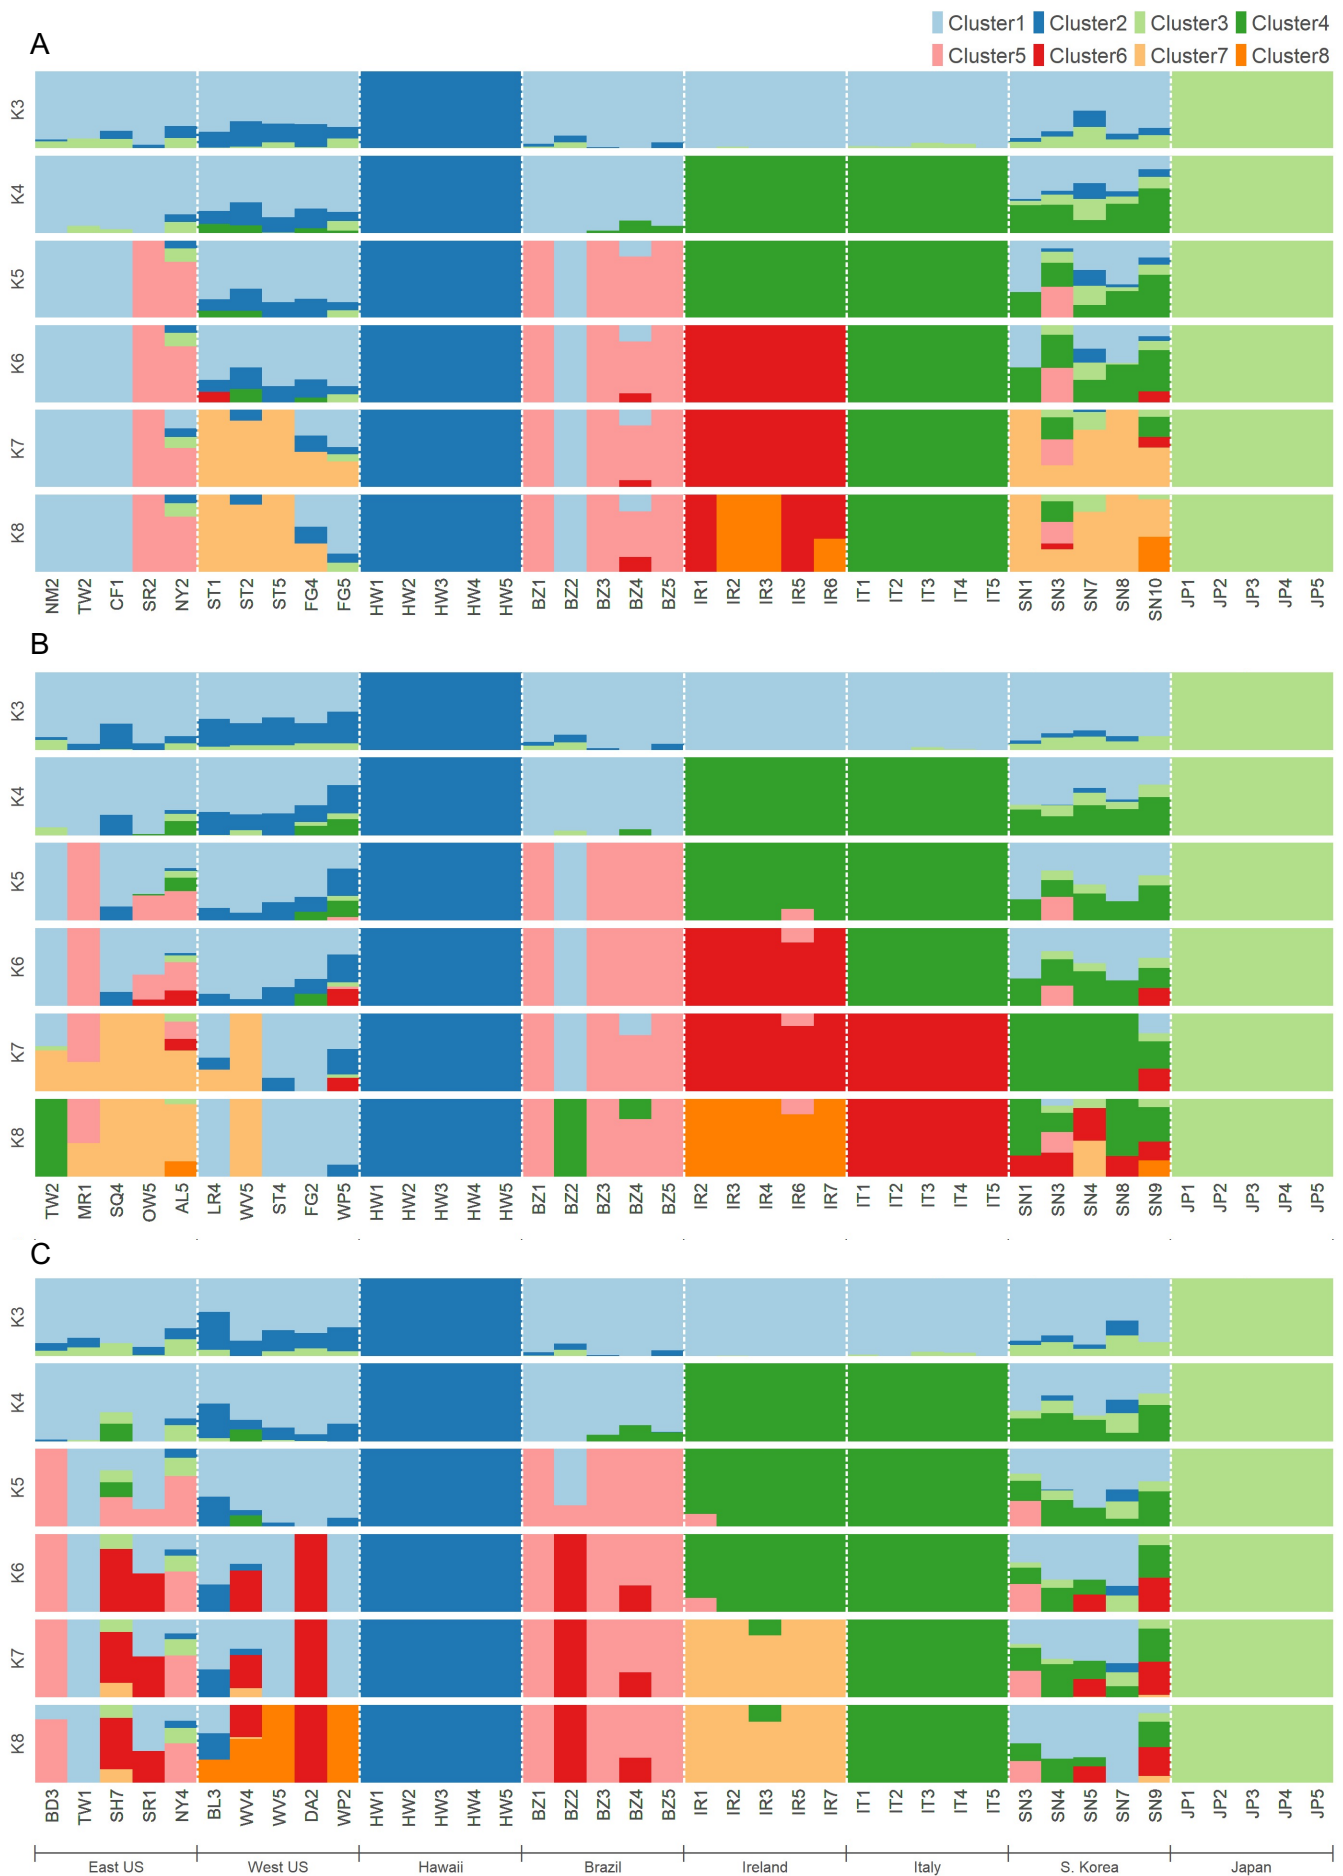

**Figure S5: Admixture proportions estimated from subsampled clusters. (A-C)** 5 random individuals were sampled from each population cluster for each analysis. Samples labeled by name, followed by population cluster. For the fourth subsample, see Figure 2C. 144,661-152,424 sites used.
