# Supplementary material
Source: publisher figshare collection journal article supplement (https://gsajournals.figshare.com/ndownloader/files/30838336)
Supplement: Supplementary file 3 [file 30838336 › G3-2021-402773_SuppMaterials/Figure S6.pdf]

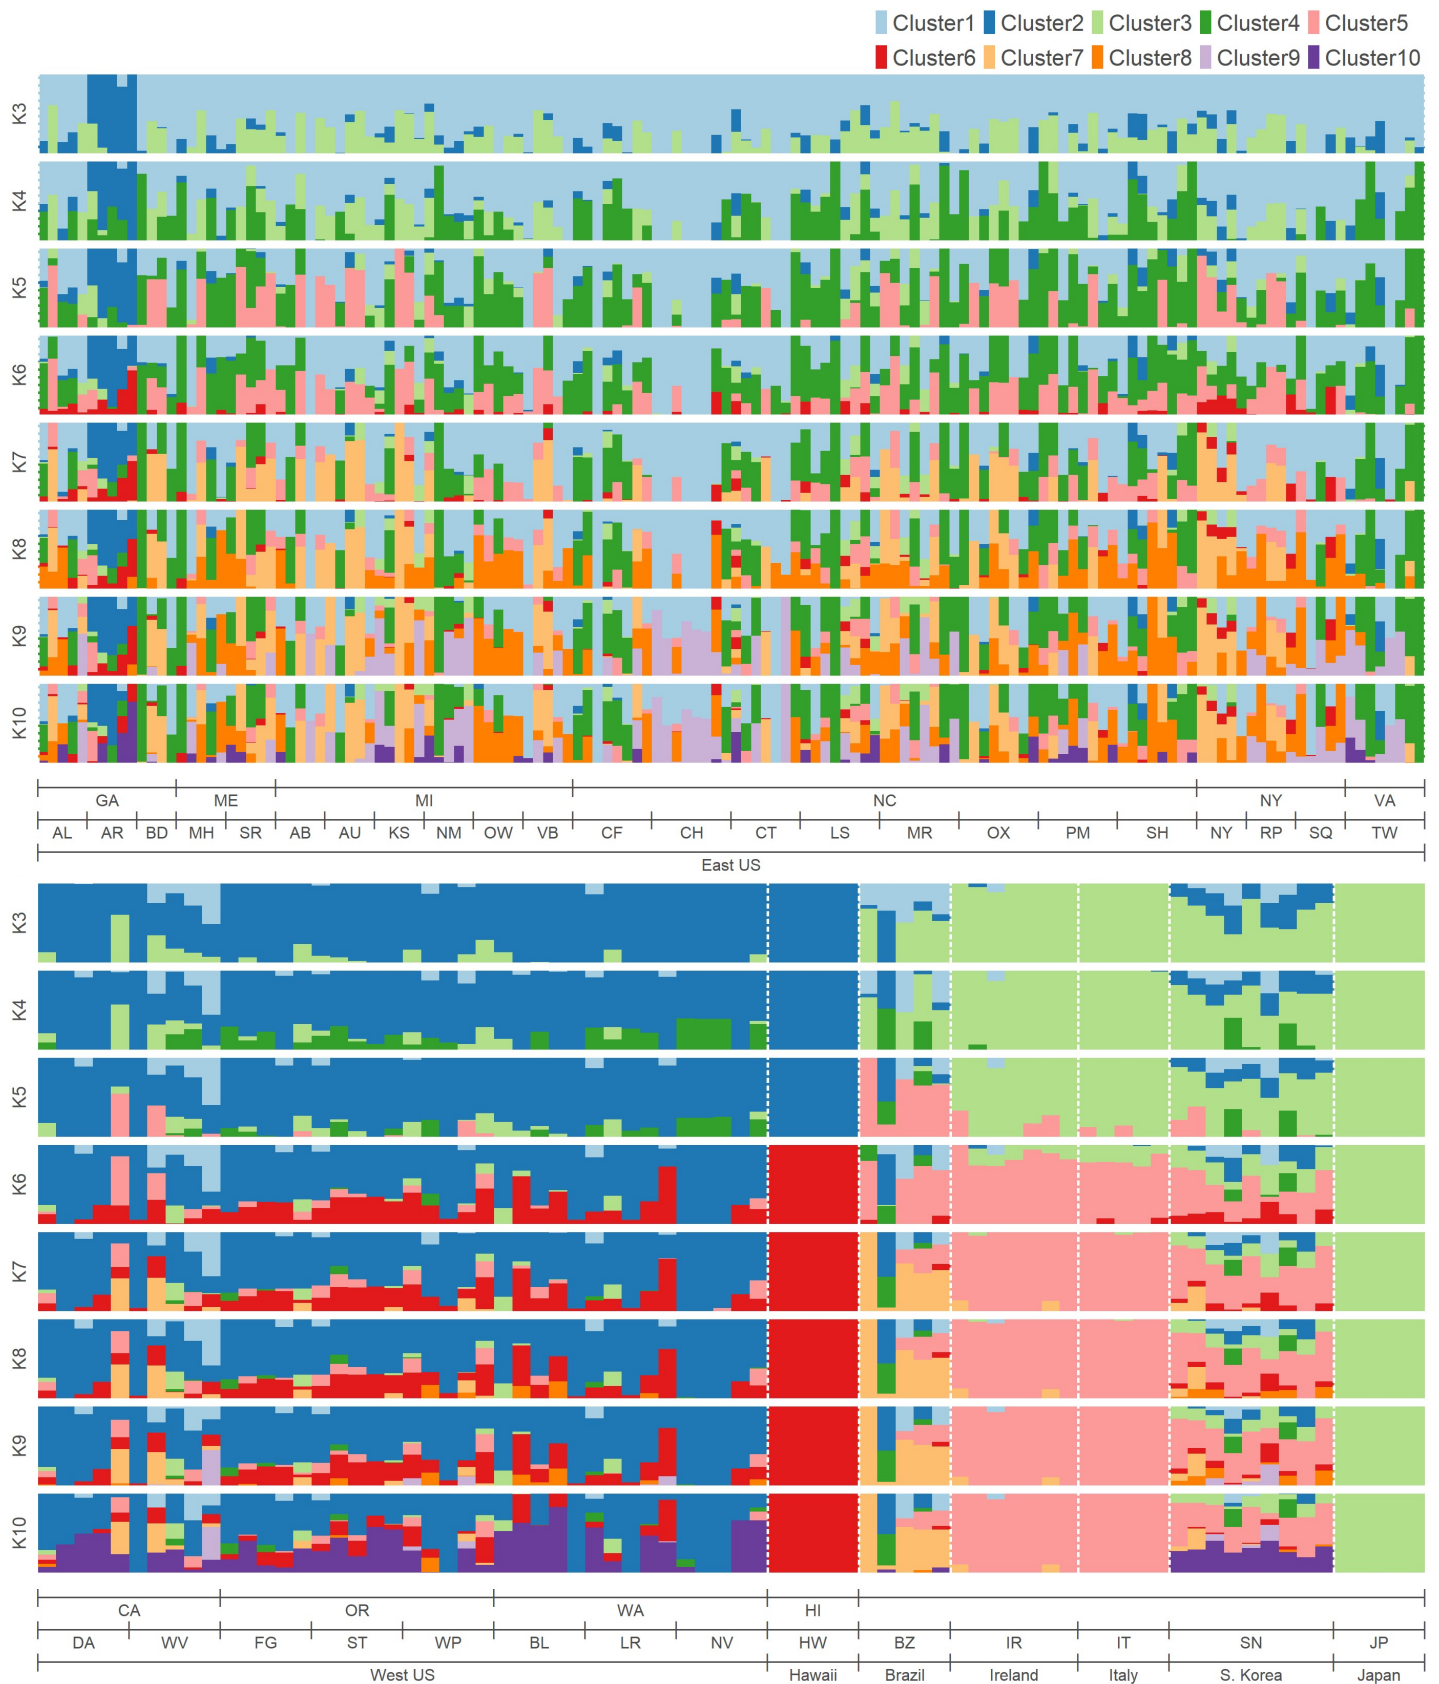

**Figure S6: Admixture proportions estimated from all samples combined.** Up to 10 clusters (k) were used. Samples are labeled by state if applicable, followed by population cluster. 206,093 sites used.
