# Supplementary material
Source: publisher figshare collection journal article supplement (https://gsajournals.figshare.com/ndownloader/files/30838336)
Supplement: Supplementary file 3 [file 30838336 › G3-2021-402773_SuppMaterials/Figure S8.pdf]

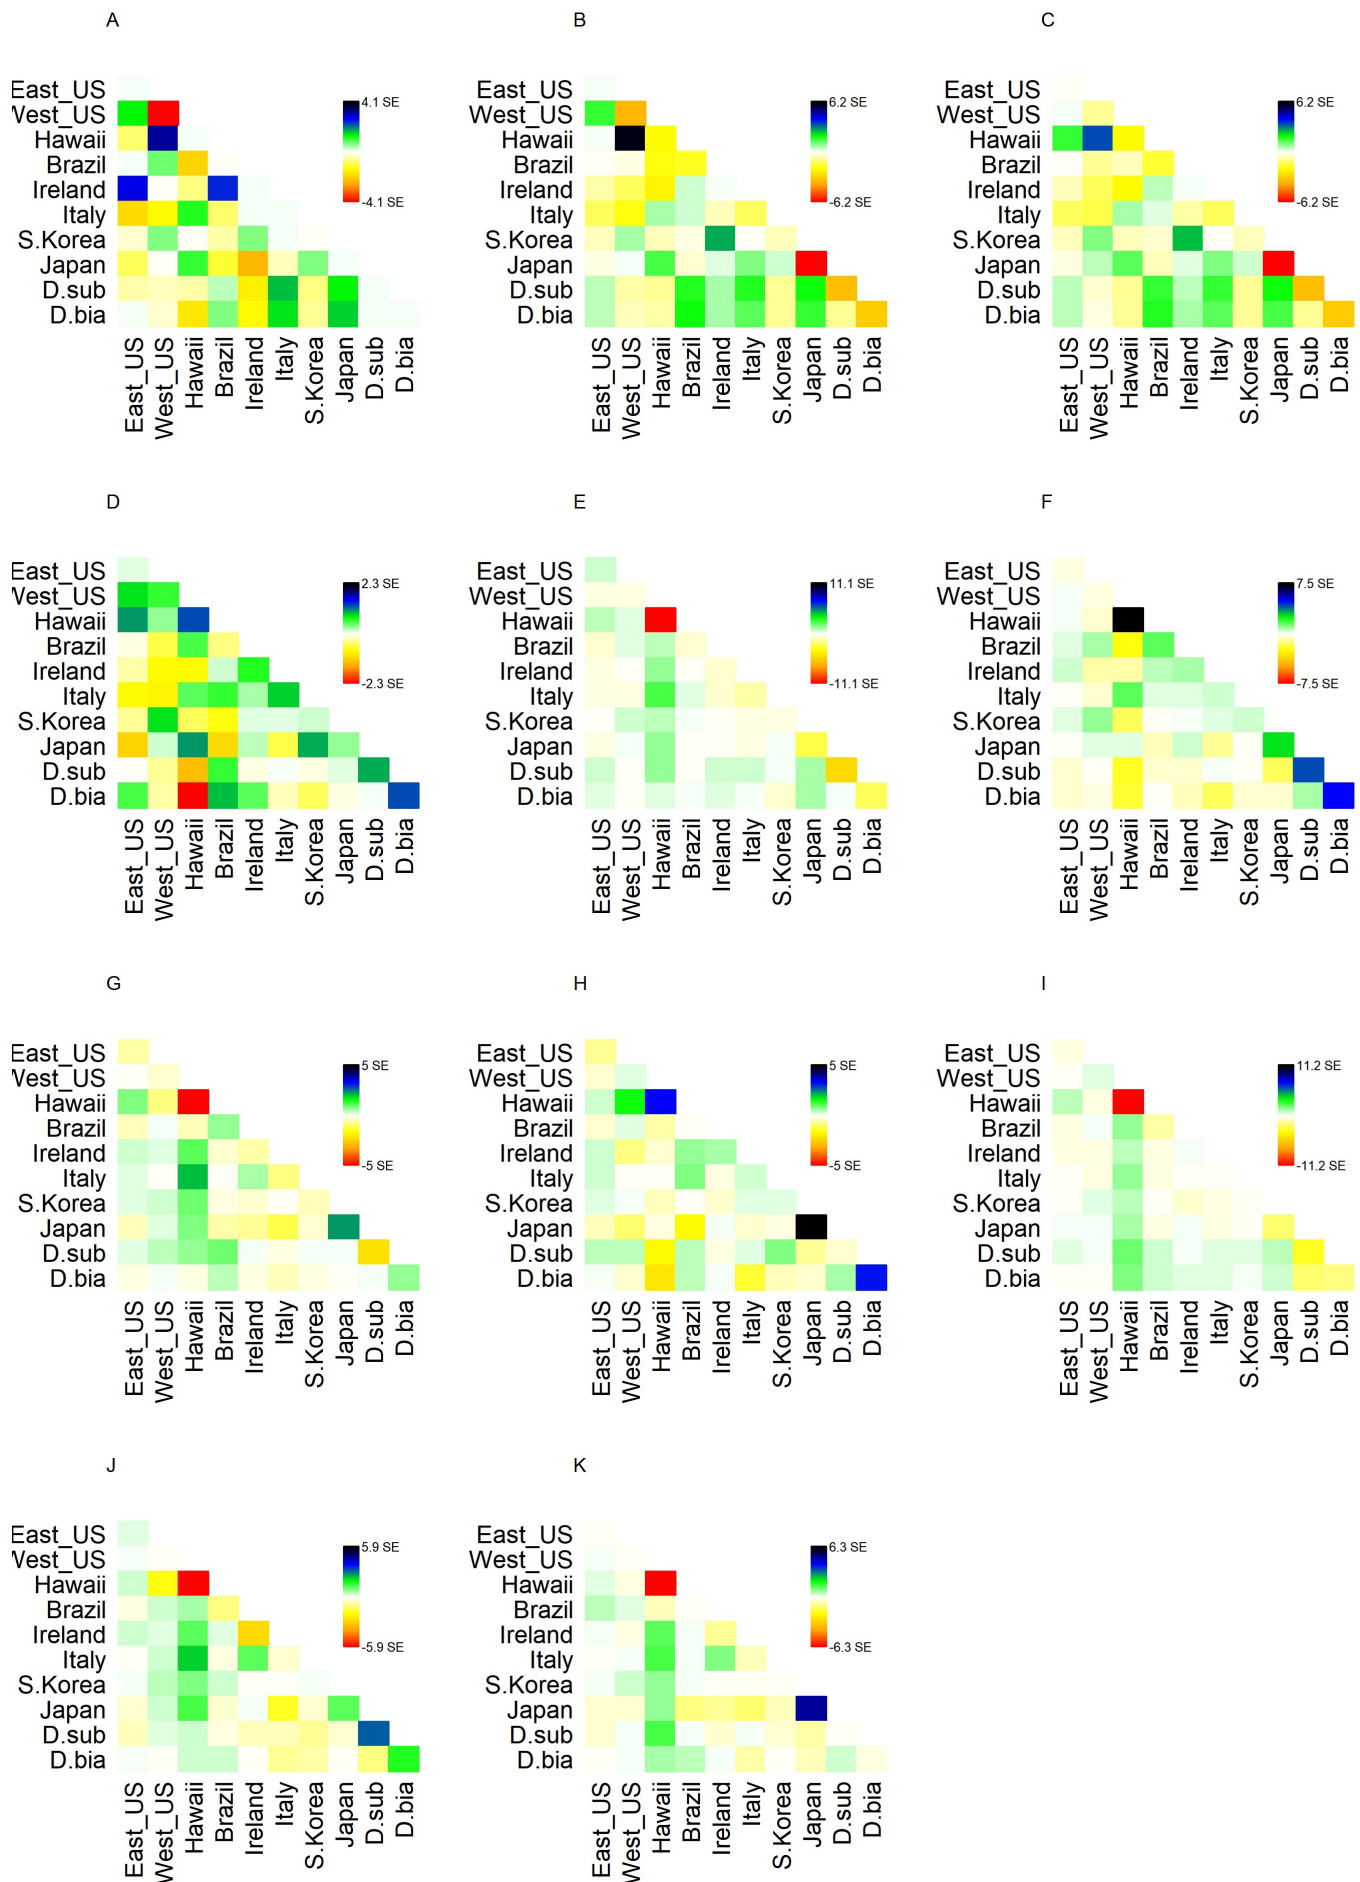

**Figure S8: Plots of standard error of residuals between populations based on models generated by treemix, from 0 to 10 migration edges.** High residuals indicate the model underestimates the data's co-variance, which could be a sign more migrations are needed. Low residuals may indicate the two populations are too close in the graph due to unmodeled migration elsewhere.
