# Supplementary material
Source: publisher figshare collection journal article supplement (https://gsajournals.figshare.com/ndownloader/files/30838336)
Supplement: Supplementary file 3 [file 30838336 › G3-2021-402773_SuppMaterials/Table S1.xlsx]

## Sheet: SUPP_popinfo
Table S1: Details for all Drosophila suzukii samples sequenced, indicating collection time and location, as well as sequencing lane number, inbreeding coefficient, and average coverage of sequencing data.
sample_name	collection_date	geo_loc_name	lat	lon	lane	inbreeding coefficient	average coverage
AB1	2016-08-02	USA:Allegan,MI	42.5589	-85.8577	5	0.0287061	6.75681
AB2	2016-08-02	USA:Allegan,MI	42.5589	-85.8577	5	0.0348396	6.34885
AB3	2016-08-02	USA:Allegan,MI	42.5589	-85.8577	5	-0.0722252	7.19919
AB4	2016-08-02	USA:Allegan,MI	42.5589	-85.8577	5	-0.0295688	7.30435
AB5	2016-08-02	USA:Allegan,MI	42.5589	-85.8577	5	-0.0788885	6.23765
AL1	2016-07-18/2016-08-10	USA:Wade Lane, Alma,Bacon county,GA	31.5372	-82.5108	7	0.208339	3.07012
AL2	2016-07-18/2016-08-10	USA:Wade Lane, Alma,Bacon county,GA	31.5372	-82.5108	7	0.032446	4.65777
AL3	2016-07-18/2016-08-10	USA:Wade Lane, Alma,Bacon county,GA	31.5372	-82.5108	7	-0.00775063	5.76007
AL4	2016-07-18/2016-08-10	USA:Wade Lane, Alma,Bacon county,GA	31.5372	-82.5108	7	0.126366	6.79097
AL5	2016-07-18/2016-08-10	USA:Wade Lane, Alma,Bacon county,GA	31.5372	-82.5108	7	-0.0616918	5.30837
AR1	2016-07-18/2016-08-10	USA:Alma research farm-Bacon county,GA	31.5414	-82.4635	6	0.112909	5.05251
AR2	2016-07-18/2016-08-10	USA:Alma research farm-Bacon county,GA	31.5414	-82.4635	6	0.146769	7.33885
AR3	2016-07-18/2016-08-10	USA:Alma research farm-Bacon county,GA	31.5414	-82.4635	6	0.139185	5.98268
AR4	2016-07-18/2016-08-10	USA:Alma research farm-Bacon county,GA	31.5414	-82.4635	6	0.217182	4.54147
AR5	2016-07-18/2016-08-10	USA:Alma research farm-Bacon county,GA	31.5414	-82.4635	6	0.198666	8.40212
AU1	2016-07-22	USA:Allegan,MI	42.5589	-85.8577	6	-0.0527711	8.63517
AU2	2016-07-22	USA:Allegan,MI	42.5589	-85.8577	6	0.0196357	9.33233
AU3	2016-07-22	USA:Allegan,MI	42.5589	-85.8577	6	-0.00594711	10.9833
AU4	2016-07-22	USA:Allegan,MI	42.5589	-85.8577	6	-0.107755	13.772
AU5	2016-07-22	USA:Allegan,MI	42.5589	-85.8577	6	-0.221678	11.8335
BD2	2016-07-18/2016-08-10	USA:Bazley Dole Farm,Appling county,GA	31.7756	-82.4906	8	0.120872	6.55288
BD3	2016-07-18/2016-08-10	USA:Bazley Dole Farm,Appling county,GA	31.7756	-82.4906	8	-0.0686363	3.61279
BD4	2016-07-18/2016-08-10	USA:Bazley Dole Farm,Appling county,GA	31.7756	-82.4906	8	-0.0768366	5.86861
BD5	2016-07-18/2016-08-10	USA:Bazley Dole Farm,Appling county,GA	31.7756	-82.4906	8	0.0445253	5.55263
BL1	2016-08-19	USA:Olympia,WA	47.0279	-122.949	4	-0.0514879	12.2689
BL2	2016-08-19	USA:Olympia,WA	47.0279	-122.949	5	0.155968	6.82571
BL3	2016-08-19	USA:Olympia,WA	47.0279	-122.949	4	0.011295	11.4092
BL4	2016-08-19	USA:Olympia,WA	47.0279	-122.949	4	-0.148038	10.4966
BL5	2016-08-19	USA:Olympia,WA	47.0279	-122.949	4	-0.0263677	9.6026
BZ1	2015-01	Brazil:Pelotas,Rio Grande Do Sul	-31.6233	-52.5227	7	0.154649	6.76717
BZ2	2015-01	Brazil:Pelotas,Rio Grande Do Sul	-31.6233	-52.5227	7	0.0841771	6.98246
BZ3	2015-01	Brazil:Pelotas,Rio Grande Do Sul	-31.6233	-52.5227	7	-0.0918406	5.39283
BZ4	2015-01	Brazil:Pelotas,Rio Grande Do Sul	-31.6233	-52.5227	7	-0.0518821	6.00055
BZ5	2015-01	Brazil:Pelotas,Rio Grande Do Sul	-31.6233	-52.5227	7	-0.0641464	6.02044
CF1	2016-07	USA:Cherry Farm,NC	36.1411	-77.2119	3	0.0211729	10.4258
CF2	2016-07	USA:Cherry Farm,NC	36.1411	-77.2119	3	-0.158907	15.6532
CF3	2016-07	USA:Cherry Farm,NC	36.1411	-77.2119	3	-0.049504	19.0649
CF4	2016-07	USA:Cherry Farm,NC	36.1411	-77.2119	3	-0.15076	17.7299
CF5	2016-07	USA:Cherry Farm,NC	36.1411	-77.2119	3	-0.0994394	17.8636
CF6	2016-07	USA:Cherry Farm,NC	36.1411	-77.2119	3	-0.0285627	15.4007
CF7	2016-07	USA:Cherry Farm,NC	36.1411	-77.2119	3	-0.189943	13.7333
CF8	2016-07	USA:Cherry Farm,NC	36.1411	-77.2119	3	-0.059126	17.5743
CH1	2016-06	USA:Castle Hayne,NC	34.3615	-77.8359	2	-0.0358738	16.3718
CH2	2016-06	USA:Castle Hayne,NC	34.3615	-77.8359	2	-0.0690264	12.7575
CH3	2016-06	USA:Castle Hayne,NC	34.3615	-77.8359	2	-0.0803335	14.8748
CH4	2016-06	USA:Castle Hayne,NC	34.3615	-77.8359	2	-0.122316	12.4941
CH5	2016-06	USA:Castle Hayne,NC	34.3615	-77.8359	3	-0.152019	13.2696
CH6	2016-06	USA:Castle Hayne,NC	34.3615	-77.8359	3	-0.163269	11.6402
CH7	2016-06	USA:Castle Hayne,NC	34.3615	-77.8359	3	-0.0286956	11.1117
CH8	2016-06	USA:Castle Hayne,NC	34.3615	-77.8359	3	-0.174269	11.2154
CT1	2016-05	USA:Clayton,NC	35.5543	-78.425131	2	-0.141242	13.6266
CT2	2016-05	USA:Clayton,NC	35.5543	-78.425131	2	-0.238872	13.2042
CT3	2016-05	USA:Clayton,NC	35.5543	-78.425131	2	-0.105262	13.3885
CT5	2016-05	USA:Clayton,NC	35.5543	-78.425131	5	-0.0761366	5.70065
CT6	2016-05	USA:Clayton,NC	35.5543	-78.425131	2	-0.185105	14.2374
CT7	2016-05	USA:Clayton,NC	35.5543	-78.425131	2	0.0149713	15.7717
CT8	2016-05	USA:Clayton,NC	35.5543	-78.425131	2	0.14614	10.4361
DA1	2017-07	USA:Davis,CA	38.5449	-121.741	8	-0.0982654	9.82573
DA2	2017-07	USA:Davis,CA	38.5449	-121.741	8	0.0269744	10.645
DA3	2017-07	USA:Davis,CA	38.5449	-121.741	8	-0.0729381	7.89055
DA4	2017-07	USA:Davis,CA	38.5449	-121.741	8	-0.101767	12.6086
DA5	2017-07	USA:Davis,CA	38.5449	-121.741	8	-0.0752131	13.2119
DD1	2016-07-14	China:Dandeong	40.0044	124.372	8	-	0.442729
DD2	2016-07-14	China:Dandeong	40.0044	124.372	8	-	1.81747
DD3	2016-07-14	China:Dandeong	40.0044	124.372	8	-	1.00549
DD4	2016-07-14	China:Dandeong	40.0044	124.372	8	-	0.630418
FG1	2016-08-18	USA:Banks,OR	45.5827	-123.114	7	0.356963	4.36386
FG2	2016-08-18	USA:Banks,OR	45.5827	-123.114	7	0.0762374	6.94429
FG3	2016-08-18	USA:Banks,OR	45.5827	-123.114	7	0.449492	3.31863
FG4	2016-08-18	USA:Banks,OR	45.5827	-123.114	7	0.384581	2.67282
FG5	2016-08-18	USA:Banks,OR	45.5827	-123.114	7	0.328205	3.39403
HW1	2009-02	USA:Oahu,HI	21.4456	-157.998	7	0.284742	7.156
HW2	2009-02	USA:Oahu,HI	21.4456	-157.998	7	0.294298	7.15733
HW3	2009-02	USA:Oahu,HI	21.4456	-157.998	7	0.753956	6.31686
HW4	2009-02	USA:Oahu,HI	21.4456	-157.998	7	0.266595	7.281
HW5	2009-02	USA:Oahu,HI	21.4456	-157.998	7	0.758752	5.21972
IR1	2016-06	Ireland:North Dublin	53.3519	-6.26634	8	0.283364	7.42726
IR2	2016-06	Ireland:North Dublin	53.3519	-6.26634	8	-0.153585	10.732
IR3	2016-06	Ireland:North Dublin	53.3519	-6.26634	8	0.114601	7.39991
IR4	2016-06	Ireland:North Dublin	53.3519	-6.26634	8	-0.217141	7.5144
IR5	2016-06	Ireland:North Dublin	53.3519	-6.26634	8	-0.0380313	8.78062
IR6	2016-06	Ireland:North Dublin	53.3519	-6.26634	8	-0.242813	9.75429
IR7	2016-06	Ireland:North Dublin	53.3519	-6.26634	8	-0.131538	6.25176
IT1	2014-09/2014-12	Italy:Trento,Pergine Valsugana	46.0654	11.5067	7	0.275445	6.15707
IT2	2014-09/2014-12	Italy:Trento,Pergine Valsugana	46.0654	11.5067	7	0.38072	3.79483
IT3	2014-09/2014-12	Italy:Trento,Pergine Valsugana	46.0654	11.5067	7	0.297683	3.69899
IT4	2014-09/2014-12	Italy:Trento,Pergine Valsugana	46.0654	11.5067	7	0.263424	6.291
IT5	2014-09/2014-12	Italy:Trento,Pergine Valsugana	46.0654	11.5067	7	0.42301	4.4361
JP1	2002	Japan:Ehime	33.7116	132.838	8	0.742831	11.2388
JP2	2002	Japan:Ehime	33.7116	132.838	8	0.230383	9.19707
JP3	2002	Japan:Ehime	33.7116	132.838	8	0.197301	12.3161
JP4	2002	Japan:Ehime	33.7116	132.838	8	0.220892	9.60716
JP5	2002	Japan:Ehime	33.7116	132.838	8	0.196176	11.2027
KM1	2016-08-01	China:Kunming,Yunnan	25.0986	102.835	4	0.679475	4.20664
KM2	2016-08-01	China:Kunming,Yunnan	25.0986	102.835	4	0.736825	6.88407
KM3	2016-08-01	China:Kunming,Yunnan	25.0986	102.835	4	0.490705	14.6645
KM4	2016-08-01	China:Kunming,Yunnan	25.0986	102.835	4	0.633569	6.92073
KM5	2016-08-01	China:Kunming,Yunnan	25.0986	102.835	4	0.418946	12.7621
KS1	2016-07-21	USA:Kent,MI	43.0081	-85.5192	6	-0.050586	7.48114
KS2	2016-07-21	USA:Kent,MI	43.0081	-85.5192	6	-0.125055	7.00286
KS3	2016-07-21	USA:Kent,MI	43.0081	-85.5192	6	-0.0144411	20.6664
KS4	2016-07-21	USA:Kent,MI	43.0081	-85.5192	6	-0.0682862	10.8045
KS5	2016-07-21	USA:Kent,MI	43.0081	-85.5192	6	-0.0359219	10.4895
LR1	2016-08-18	USA:Little Rock,WA	46.9021	-123.02	4	-0.0699598	9.94801
LR2	2016-08-18	USA:Little Rock,WA	46.9021	-123.02	4	0.0264665	9.48659
LR3	2016-08-18	USA:Little Rock,WA	46.9021	-123.02	4	-0.190819	8.01878
LR4	2016-08-18	USA:Little Rock,WA	46.9021	-123.02	4	-0.0140485	8.42933
LR5	2016-08-18	USA:Little Rock,WA	46.9021	-123.02	4	0.134892	9.22694
LS1	2016-06	USA:Laurel Springs,NC	36.4115	-81.2629	3	-0.103603	15.322
LS2	2016-06	USA:Laurel Springs,NC	36.4115	-81.2629	3	-0.120764	16.6037
LS3	2016-06	USA:Laurel Springs,NC	36.4115	-81.2629	3	-0.254857	17.3029
LS4	2016-06	USA:Laurel Springs,NC	36.4115	-81.2629	3	0.00504661	15.0479
LS5	2016-06	USA:Laurel Springs,NC	36.4115	-81.2629	3	0.0407714	14.4628
LS6	2016-06	USA:Laurel Springs,NC	36.4115	-81.2629	3	-0.000396252	14.8998
LS7	2016-06	USA:Laurel Springs,NC	36.4115	-81.2629	3	-0.0452688	13.3992
LS8	2016-06	USA:Laurel Springs,NC	36.4115	-81.2629	3	-0.12468	16.1494
MH1	2016-08-17/2016-08-29	USA:Marrs Hill Rd-Union,ME	44.203	-69.252	4	-0.027001	11.9333
MH2	2016-08-17/2016-08-29	USA:Marrs Hill Rd-Union,ME	44.203	-69.252	4	-0.24473	7.68285
MH3	2016-08-17/2016-08-29	USA:Marrs Hill Rd-Union,ME	44.203	-69.252	4	-0.203336	11.2427
MH4	2016-08-17/2016-08-29	USA:Marrs Hill Rd-Union,ME	44.203	-69.252	4	-0.00362551	4.38034
MH5	2016-08-17/2016-08-29	USA:Marrs Hill Rd-Union,ME	44.203	-69.252	4	0.0164704	8.78744
MR1	2016-07	USA:Mills River,NC	35.4183	-82.5582	3	0.0182244	8.67888
MR2	2016-07	USA:Mills River,NC	35.4183	-82.5582	3	-0.125414	12.6286
MR3	2016-07	USA:Mills River,NC	35.4183	-82.5582	3	-0.216562	12.8605
MR4	2016-07	USA:Mills River,NC	35.4183	-82.5582	3	-0.253874	12.0678
MR5	2016-07	USA:Mills River,NC	35.4183	-82.5582	3	-0.219547	11.2187
MR6	2016-07	USA:Mills River,NC	35.4183	-82.5582	3	-0.283913	10.1741
MR7	2016-07	USA:Mills River,NC	35.4183	-82.5582	3	0.0829095	10.6409
MR8	2016-07	USA:Mills River,NC	35.4183	-82.5582	3	-0.0884802	9.2644
NM1	2016-08-08	USA:Traverse,MI	44.882	-85.675573	4	-0.0404603	12.4067
NM2	2016-08-08	USA:Traverse,MI	44.882	-85.675573	4	0.0325283	11.0573
NM3	2016-08-08	USA:Traverse,MI	44.882	-85.675573	4	-0.18889	11.4724
NM4	2016-08-08	USA:Traverse,MI	44.882	-85.675573	4	-0.15585	13.1484
NM5	2016-08-08	USA:Traverse,MI	44.882	-85.675573	4	-0.122994	12.0161
NV1	2016-08-18	USA:Napavine,WA	46.5751	-122.907	8	-0.188165	7.12927
NV2	2016-08-18	USA:Napavine,WA	46.5751	-122.907	8	-0.151208	9.68365
NV3	2016-08-18	USA:Napavine,WA	46.5751	-122.907	8	-0.149143	7.97214
NV4	2016-08-18	USA:Napavine,WA	46.5751	-122.907	8	-0.0374395	9.48843
NV5	2016-08-18	USA:Napavine,WA	46.5751	-122.907	8	-0.137768	7.88131
NW1	2016-06-26	South Korea:Namwon	35.4158	127.391	4	0.632635	10.6407
NW2	2016-06-26	South Korea:Namwon	35.4158	127.391	4	0.613501	10.0702
NW3	2016-06-26	South Korea:Namwon	35.4158	127.391	4	0.624514	8.81829
NW4	2016-06-26	South Korea:Namwon	35.4158	127.391	4	0.647825	7.89077
NW5	2016-06-26	South Korea:Namwon	35.4158	127.391	4	0.608323	14.0381
NY1	2016-08-01/2016-09-01	USA:Geneva,New York	42.8619	-76.9828	7	-0.00623834	7.45734
NY2	2016-08-01/2016-09-01	USA:Geneva,New York	42.8619	-76.9828	7	-0.0575763	7.24306
NY3	2016-08-01/2016-09-01	USA:Geneva,New York	42.8619	-76.9828	7	0.0276595	6.40698
NY4	2016-08-01/2016-09-01	USA:Geneva,New York	42.8619	-76.9828	7	0.146138	7.381
NY5	2016-08-01/2016-09-01	USA:Geneva,New York	42.8619	-76.9828	7	-0.207412	7.01062
OW1	2016-07-27	USA:Ottawa,MI	42.953	-86.0947	6	0.0118272	8.11078
OW2	2016-07-27	USA:Ottawa,MI	42.953	-86.0947	6	0.0653482	5.3045
OW3	2016-07-27	USA:Ottawa,MI	42.953	-86.0947	6	0.0239182	5.3472
OW4	2016-07-27	USA:Ottawa,MI	42.953	-86.0947	6	0.00448728	4.72509
OW5	2016-07-27	USA:Ottawa,MI	42.953	-86.0947	6	0.0821955	4.8336
OX1	2016-06	USA:Oxford,NC	36.3244	-78.6572	2	0.0191846	12.2418
OX2	2016-06	USA:Oxford,NC	36.3244	-78.6572	2	-0.267331	11.5388
OX3	2016-06	USA:Oxford,NC	36.3244	-78.6572	2	-0.20116	14.2695
OX4	2016-06	USA:Oxford,NC	36.3244	-78.6572	5	0.174503	5.49225
OX5	2016-06	USA:Oxford,NC	36.3244	-78.6572	5	0.145971	5.01227
OX6	2016-06	USA:Oxford,NC	36.3244	-78.6572	2	-0.132125	18.8716
OX7	2016-06	USA:Oxford,NC	36.3244	-78.6572	2	-0.100758	9.64085
OX8	2016-06	USA:Oxford,NC	36.3244	-78.6572	2	-0.168478	15.8166
PM1	2016-06	USA:Piedmont,NC	36.3051	-79.6583	3	0.153281	19.1687
PM2	2016-06	USA:Piedmont,NC	36.3051	-79.6583	3	-0.286606	19.1466
PM3	2016-06	USA:Piedmont,NC	36.3051	-79.6583	3	-0.0856278	14.2913
PM4	2016-06	USA:Piedmont,NC	36.3051	-79.6583	3	-0.0981268	14.4941
PM5	2016-06	USA:Piedmont,NC	36.3051	-79.6583	3	-0.287547	17.7777
PM6	2016-06	USA:Piedmont,NC	36.3051	-79.6583	3	-0.130904	17.8529
PM7	2016-06	USA:Piedmont,NC	36.3051	-79.6583	3	-0.0991832	12.6723
PM8	2016-06	USA:Piedmont,NC	36.3051	-79.6583	3	-0.209002	19.0855
RP1	2016-08	USA:Ontario county,NY	42.8573	-77.0211	5	-0.0120771	6.31852
RP2	2016-08	USA:Ontario county,NY	42.8573	-77.0211	5	0.0397669	6.89929
RP3	2016-08	USA:Ontario county,NY	42.8573	-77.0211	5	0.0290062	6.86533
RP4	2016-08	USA:Ontario county,NY	42.8573	-77.0211	5	-0.101254	6.44795
RP5	2016-08	USA:Ontario county,NY	42.8573	-77.0211	5	0.173381	7.27159
SH1	2016-06	USA:Sandhills,NC	35.2748	-79.3909	2	-0.184977	17.9413
SH2	2016-06	USA:Sandhills,NC	35.2748	-79.3909	2	-0.0997648	17.0913
SH3	2016-06	USA:Sandhills,NC	35.2748	-79.3909	2	-0.124812	22.0581
SH4	2016-06	USA:Sandhills,NC	35.2748	-79.3909	2	-0.00905824	13.1328
SH5	2016-06	USA:Sandhills,NC	35.2748	-79.3909	2	-0.143502	18.5969
SH6	2016-06	USA:Sandhills,NC	35.2748	-79.3909	2	-0.120231	15.4789
SH7	2016-06	USA:Sandhills,NC	35.2748	-79.3909	2	-0.167032	16.8111
SH8	2016-06	USA:Sandhills,NC	35.2748	-79.3909	2	-0.0550182	16.1822
SN1	2016-06-27	South Korea:Sancheong	37.5683	126.998	4	0.147291	8.32156
SN10	2016-06-27	South Korea:Sancheong	37.5683	126.998	8	0.0968792	4.61021
SN2	2016-06-27	South Korea:Sancheong	37.5683	126.998	4	0.0496801	12.0007
SN3	2016-06-27	South Korea:Sancheong	37.5683	126.998	4	0.190532	11.1468
SN4	2016-06-27	South Korea:Sancheong	37.5683	126.998	4	0.159723	11.9476
SN5	2016-06-27	South Korea:Sancheong	37.5683	126.998	4	0.077302	12.2911
SN6	2016-06-27	South Korea:Sancheong	37.5683	126.998	8	0.619659	2.88538
SN7	2016-06-27	South Korea:Sancheong	37.5683	126.998	8	0.315037	2.65469
SN8	2016-06-27	South Korea:Sancheong	37.5683	126.998	8	0.303991	3.07068
SN9	2016-06-27	South Korea:Sancheong	37.5683	126.998	8	0.155911	2.81297
SQ1	2016-08	USA:Schuyler county,NY	42.4907	-76.73	5	0.127506	6.28728
SQ2	2016-08	USA:Schuyler county,NY	42.4907	-76.73	5	0.0625386	7.8485
SQ3	2016-08	USA:Schuyler county,NY	42.4907	-76.73	5	-0.127646	9.02939
SQ4	2016-08	USA:Schuyler county,NY	42.4907	-76.73	5	0.239239	6.5006
SQ5	2016-08	USA:Schuyler county,NY	42.4907	-76.73	5	0.0318919	6.00937
SR1	2016-08-17/2016-08-29	USA:Sidelinger Road,Union,ME	44.2032	-69.3498	5	0.0294816	5.44525
SR2	2016-08-17/2016-08-29	USA:Sidelinger Road,Union,ME	44.2032	-69.3498	5	0.0631428	5.53473
SR3	2016-08-17/2016-08-29	USA:Sidelinger Road,Union,ME	44.2032	-69.3498	5	0.024093	6.15712
SR4	2016-08-17/2016-08-29	USA:Sidelinger Road,Union,ME	44.2032	-69.3498	5	0.0771787	5.14473
SR5	2016-08-17/2016-08-29	USA:Sidelinger Road,Union,ME	44.2032	-69.3498	5	0.00359154	5.33994
ST1	2016-08-02	USA:53rd Street-Corvallis,OR	44.5593	-123.311	7	0.206949	6.07314
ST2	2016-08-02	USA:53rd Street-Corvallis,OR	44.5593	-123.311	7	-0.0701448	11.2832
ST3	2016-08-02	USA:53rd Street-Corvallis,OR	44.5593	-123.311	7	0.101414	5.92375
ST4	2016-08-02	USA:53rd Street-Corvallis,OR	44.5593	-123.311	7	0.282904	3.04805
ST5	2016-08-02	USA:53rd Street-Corvallis,OR	44.5593	-123.311	7	0.27601	3.55701
TW1	2016-05	USA:Virginia Beach,VA	36.8529	-75.978	2	-0.0425688	14.783
TW2	2016-05	USA:Virginia Beach,VA	36.8529	-75.978	2	-0.211539	9.74286
TW3	2016-05	USA:Virginia Beach,VA	36.8529	-75.978	2	-0.0941579	16.2226
TW4	2016-05	USA:Virginia Beach,VA	36.8529	-75.978	2	-0.123495	16.0495
TW5	2016-05	USA:Virginia Beach,VA	36.8529	-75.978	2	-0.126149	16.0445
TW6	2016-05	USA:Virginia Beach,VA	36.8529	-75.978	2	-0.20529	16.1123
TW7	2016-05	USA:Virginia Beach,VA	36.8529	-75.978	2	-0.0980529	15.1199
TW8	2016-05	USA:Virginia Beach,VA	36.8529	-75.978	2	-0.131437	18.9094
VB1	2016-08-02	USA:Van Buren,MI	42.2431	-86.0036	6	0.114641	5.75021
VB2	2016-08-02	USA:Van Buren,MI	42.2431	-86.0036	6	0.0470675	6.33469
VB3	2016-08-02	USA:Van Buren,MI	42.2431	-86.0036	6	-0.00918305	4.67883
VB4	2016-08-02	USA:Van Buren,MI	42.2431	-86.0036	6	-0.110398	5.22397
VB5	2016-08-02	USA:Van Buren,MI	42.2431	-86.0036	6	-0.00324309	5.72349
WA1	2017-07	USA:Watsonville,CA	36.9102	-121.757	8	-	11.4557
WA2	2017-07	USA:Watsonville,CA	36.9102	-121.757	8	-	2.42801
WA3	2017-07	USA:Watsonville,CA	36.9102	-121.757	8	-	6.41578
WA4	2017-07	USA:Watsonville,CA	36.9102	-121.757	8	-	8.17956
WA5	2017-07	USA:Watsonville,CA	36.9102	-121.757	8	-	9.11749
WP1	2016-08-19	USA:Willamette Park-Corvallis,OR	44.5482	-123.246	7	0.1538	10.8267
WP2	2016-08-19	USA:Willamette Park-Corvallis,OR	44.5482	-123.246	7	0.267222	5.36281
WP3	2016-08-19	USA:Willamette Park-Corvallis,OR	44.5482	-123.246	7	0.213029	5.24753
WP4	2016-08-19	USA:Willamette Park-Corvallis,OR	44.5482	-123.246	7	0.135138	8.96113
WP5	2016-08-19	USA:Willamette Park-Corvallis,OR	44.5482	-123.246	7	0.050176	9.11058
WV1	2016-07-15	USA:Watsonville,CA	36.8989	-121.771	4	-0.0177414	14.5541
WV2	2016-07-15	USA:Watsonville,CA	36.8989	-121.771	4	0.0341292	9.01687
WV3	2016-07-15	USA:Watsonville,CA	36.8989	-121.771	4	0.024116	11.6769
WV4	2016-07-15	USA:Watsonville,CA	36.8989	-121.771	4	-0.153651	10.4467
WV5	2016-07-15	USA:Watsonville,CA	36.8989	-121.771	4	0.10226	12.3337
