# Supplementary material
Source: publisher figshare collection journal article supplement (https://gsajournals.figshare.com/ndownloader/files/30838336)
Supplement: Supplementary file 3 [file 30838336 › G3-2021-402773_SuppMaterials/Table S2.xlsx]

## Sheet: Sheet1
Table S2: Details of sequences used in COX2 phylogenetic analysis
species	sample name	genbank accession/flybase ID	haplotype	reference
Drosophila biarmipes	AF474094.1	AF474094.1	Dbia01	O'Grady and Kidwell, 20021
Drosophila biarmipes	AF461274.1	AF461274.1	Dbia02	Schawaroch 20022
Drosophila lutescens	AF474090.1	AF474090.1	Dlut01	O'Grady and Kidwell, 20021
Drosophila lutescens	AF461271.1	AF461271.1	Dlut02	Schawaroch 20022
Drosophila melanogaster	FBgn0013675	FBgn0013675	Dmel01	Larkin et al, 20213
Drosophila mimetica	AF461273.1	AF461273.1	Dmim01	Schawaroch 20022
Drosophila mimetica	AF474092.1	AF474092.1	Dmim02	O'Grady and Kidwell, 20021
Drosophila pulchrella	KP731201.1	KP731201.1	Dpul01	Sarswat et al, 20164
Drosophila pulchrella	KP731200.1	KP731200.1	Dpul01	Sarswat et al, 20164
Drosophila pulchrella	KP731198.1	KP731198.1	Dpul01	Sarswat et al, 20164
Drosophila pulchrella	KP731197.1	KP731197.1	Dpul01	Sarswat et al, 20164
Drosophila pulchrella	KP731199.1	KP731199.1	Dpul01	Sarswat et al, 20164
Drosophila pulchrella	KP731195.1	KP731195.1	Dpul02	Sarswat et al, 20164
Drosophila pulchrella	KP731194.1	KP731194.1	Dpul02	Sarswat et al, 20164
Drosophila pulchrella	KP731193.1	KP731193.1	Dpul02	Sarswat et al, 20164
Drosophila pulchrella	KP731192.1	KP731192.1	Dpul02	Sarswat et al, 20164
Drosophila pulchrella	KP731196.1	KP731196.1	Dpul02	Sarswat et al, 20164
Drosophila pulchrella	AF474093.1	AF474093.1	Dpul03	O'Grady and Kidwell, 20021
Drosophila subpulchrella	NW_023665634.1:1131104-1146217	NW_023665634.1	Dsub01	Durkin et al, 20215
Drosophila suzukii	HQ631606.1	HQ631606.1	Dsuz01	Yang et al 20126
Drosophila suzukii	SN5	N/A	Dsuz02	This study
Drosophila suzukii	NW5	N/A	Dsuz03	This study
Drosophila suzukii	KM1	N/A	Dsuz04	This study
Drosophila suzukii	KM3	N/A	Dsuz04	This study
Drosophila suzukii	KM2	N/A	Dsuz05	This study
Drosophila suzukii	KM4	N/A	Dsuz05	This study
Drosophila suzukii	NW1	N/A	Dsuz05	This study
Drosophila suzukii	NW2	N/A	Dsuz05	This study
Drosophila suzukii	NW3	N/A	Dsuz05	This study
Drosophila suzukii	NW4	N/A	Dsuz05	This study
Drosophila suzukii	KM5	N/A	Dsuz05	This study
Drosophila suzukii	SN6	N/A	Dsuz05	This study
Drosophila suzukii	AB824812.1	AB824812.1	Dsuz06	Katoh et al, 20157
Drosophila suzukii	AB824822.1	AB824822.1	Dsuz07	Katoh et al, 20157
Drosophila suzukii	JP1	N/A	Dsuz08	This study
Drosophila suzukii	JP2	N/A	Dsuz08	This study
Drosophila suzukii	JP3	N/A	Dsuz08	This study
Drosophila suzukii	JP4	N/A	Dsuz08	This study
Drosophila suzukii	JP5	N/A	Dsuz08	This study
Drosophila suzukii	AB824815.1	AB824815.1	Dsuz09	Katoh et al, 20157
Drosophila suzukii	AB824819.1	AB824819.1	Dsuz10	Katoh et al, 20157
Drosophila suzukii	AB824811.1	AB824811.1	Dsuz11	Katoh et al, 20157
Drosophila suzukii	LN867083.1	LN867083.1	Dsuz12	Tritto et al, 20158
Drosophila suzukii	IT2	N/A	Dsuz13	This study
Drosophila suzukii	IT3	N/A	Dsuz13	This study
Drosophila suzukii	IT4	N/A	Dsuz13	This study
Drosophila suzukii	IT5	N/A	Dsuz13	This study
Drosophila suzukii	AL4	N/A	Dsuz14	This study
Drosophila suzukii	WV2	N/A	Dsuz15	This study
Drosophila suzukii	WV4	N/A	Dsuz15	This study
Drosophila suzukii	WV5	N/A	Dsuz15	This study
Drosophila suzukii	MH1	N/A	Dsuz15	This study
Drosophila suzukii	CT1	N/A	Dsuz15	This study
Drosophila suzukii	CT6	N/A	Dsuz15	This study
Drosophila suzukii	TW2	N/A	Dsuz15	This study
Drosophila suzukii	TW3	N/A	Dsuz15	This study
Drosophila suzukii	TW6	N/A	Dsuz15	This study
Drosophila suzukii	TW8	N/A	Dsuz15	This study
Drosophila suzukii	SH2	N/A	Dsuz15	This study
Drosophila suzukii	PM6	N/A	Dsuz15	This study
Drosophila suzukii	PM8	N/A	Dsuz15	This study
Drosophila suzukii	CF6	N/A	Dsuz15	This study
Drosophila suzukii	LS5	N/A	Dsuz15	This study
Drosophila suzukii	MR8	N/A	Dsuz15	This study
Drosophila suzukii	CT5	N/A	Dsuz15	This study
Drosophila suzukii	BL2	N/A	Dsuz15	This study
Drosophila suzukii	SR4	N/A	Dsuz15	This study
Drosophila suzukii	RP4	N/A	Dsuz15	This study
Drosophila suzukii	AB2	N/A	Dsuz15	This study
Drosophila suzukii	AB3	N/A	Dsuz15	This study
Drosophila suzukii	AB5	N/A	Dsuz15	This study
Drosophila suzukii	AR2	N/A	Dsuz15	This study
Drosophila suzukii	AR4	N/A	Dsuz15	This study
Drosophila suzukii	AL1	N/A	Dsuz15	This study
Drosophila suzukii	AL5	N/A	Dsuz15	This study
Drosophila suzukii	FG4	N/A	Dsuz15	This study
Drosophila suzukii	FG5	N/A	Dsuz15	This study
Drosophila suzukii	WP2	N/A	Dsuz15	This study
Drosophila suzukii	DA3	N/A	Dsuz15	This study
Drosophila suzukii	DA4	N/A	Dsuz15	This study
Drosophila suzukii	DD3	N/A	Dsuz15	This study
Drosophila suzukii	BL1	N/A	Dsuz16	This study
Drosophila suzukii	LR1	N/A	Dsuz16	This study
Drosophila suzukii	LR5	N/A	Dsuz16	This study
Drosophila suzukii	MH4	N/A	Dsuz16	This study
Drosophila suzukii	OX1	N/A	Dsuz16	This study
Drosophila suzukii	PM1	N/A	Dsuz16	This study
Drosophila suzukii	PM2	N/A	Dsuz16	This study
Drosophila suzukii	PM3	N/A	Dsuz16	This study
Drosophila suzukii	PM7	N/A	Dsuz16	This study
Drosophila suzukii	MR1	N/A	Dsuz16	This study
Drosophila suzukii	MR4	N/A	Dsuz16	This study
Drosophila suzukii	OX5	N/A	Dsuz16	This study
Drosophila suzukii	SQ1	N/A	Dsuz16	This study
Drosophila suzukii	SQ2	N/A	Dsuz16	This study
Drosophila suzukii	SQ4	N/A	Dsuz16	This study
Drosophila suzukii	OW3	N/A	Dsuz16	This study
Drosophila suzukii	OW4	N/A	Dsuz16	This study
Drosophila suzukii	OW5	N/A	Dsuz16	This study
Drosophila suzukii	AL2	N/A	Dsuz16	This study
Drosophila suzukii	ST2	N/A	Dsuz16	This study
Drosophila suzukii	ST3	N/A	Dsuz16	This study
Drosophila suzukii	ST4	N/A	Dsuz16	This study
Drosophila suzukii	ST5	N/A	Dsuz16	This study
Drosophila suzukii	FG2	N/A	Dsuz16	This study
Drosophila suzukii	FG3	N/A	Dsuz16	This study
Drosophila suzukii	WP1	N/A	Dsuz16	This study
Drosophila suzukii	WP3	N/A	Dsuz16	This study
Drosophila suzukii	WP5	N/A	Dsuz16	This study
Drosophila suzukii	HW1	N/A	Dsuz16	This study
Drosophila suzukii	HW2	N/A	Dsuz16	This study
Drosophila suzukii	HW3	N/A	Dsuz16	This study
Drosophila suzukii	HW4	N/A	Dsuz16	This study
Drosophila suzukii	HW5	N/A	Dsuz16	This study
Drosophila suzukii	BD3	N/A	Dsuz16	This study
Drosophila suzukii	AB824810.1	AB824810.1	Dsuz17	Katoh et al, 20157
Drosophila suzukii	AB824814.1	AB824814.1	Dsuz18	Katoh et al, 20157
Drosophila suzukii	AB824813.1	AB824813.1	Dsuz19	Katoh et al, 20157
Drosophila suzukii	DD4	N/A	Dsuz20	This study
Drosophila suzukii	AB824807.1	AB824807.1	Dsuz21	Katoh et al, 20157
Drosophila suzukii	SN1	N/A	Dsuz22	This study
Drosophila suzukii	SN2	N/A	Dsuz22	This study
Drosophila suzukii	NM1	N/A	Dsuz22	This study
Drosophila suzukii	NM2	N/A	Dsuz22	This study
Drosophila suzukii	NM3	N/A	Dsuz22	This study
Drosophila suzukii	NM5	N/A	Dsuz22	This study
Drosophila suzukii	MH3	N/A	Dsuz22	This study
Drosophila suzukii	MH5	N/A	Dsuz22	This study
Drosophila suzukii	CT2	N/A	Dsuz22	This study
Drosophila suzukii	CT3	N/A	Dsuz22	This study
Drosophila suzukii	CT4	N/A	Dsuz22	This study
Drosophila suzukii	TW4	N/A	Dsuz22	This study
Drosophila suzukii	SH4	N/A	Dsuz22	This study
Drosophila suzukii	SH6	N/A	Dsuz22	This study
Drosophila suzukii	SH7	N/A	Dsuz22	This study
Drosophila suzukii	OX2	N/A	Dsuz22	This study
Drosophila suzukii	OX3	N/A	Dsuz22	This study
Drosophila suzukii	CH1	N/A	Dsuz22	This study
Drosophila suzukii	CH2	N/A	Dsuz22	This study
Drosophila suzukii	CH3	N/A	Dsuz22	This study
Drosophila suzukii	CH4	N/A	Dsuz22	This study
Drosophila suzukii	CH6	N/A	Dsuz22	This study
Drosophila suzukii	CH7	N/A	Dsuz22	This study
Drosophila suzukii	PM5	N/A	Dsuz22	This study
Drosophila suzukii	CF1	N/A	Dsuz22	This study
Drosophila suzukii	CF2	N/A	Dsuz22	This study
Drosophila suzukii	CF4	N/A	Dsuz22	This study
Drosophila suzukii	CF7	N/A	Dsuz22	This study
Drosophila suzukii	CF8	N/A	Dsuz22	This study
Drosophila suzukii	LS1	N/A	Dsuz22	This study
Drosophila suzukii	LS2	N/A	Dsuz22	This study
Drosophila suzukii	LS3	N/A	Dsuz22	This study
Drosophila suzukii	LS6	N/A	Dsuz22	This study
Drosophila suzukii	LS8	N/A	Dsuz22	This study
Drosophila suzukii	MR2	N/A	Dsuz22	This study
Drosophila suzukii	MR6	N/A	Dsuz22	This study
Drosophila suzukii	OX4	N/A	Dsuz22	This study
Drosophila suzukii	SR1	N/A	Dsuz22	This study
Drosophila suzukii	SR2	N/A	Dsuz22	This study
Drosophila suzukii	SR5	N/A	Dsuz22	This study
Drosophila suzukii	RP1	N/A	Dsuz22	This study
Drosophila suzukii	RP2	N/A	Dsuz22	This study
Drosophila suzukii	RP3	N/A	Dsuz22	This study
Drosophila suzukii	RP5	N/A	Dsuz22	This study
Drosophila suzukii	SQ5	N/A	Dsuz22	This study
Drosophila suzukii	AB1	N/A	Dsuz22	This study
Drosophila suzukii	VB1	N/A	Dsuz22	This study
Drosophila suzukii	VB4	N/A	Dsuz22	This study
Drosophila suzukii	VB5	N/A	Dsuz22	This study
Drosophila suzukii	OW2	N/A	Dsuz22	This study
Drosophila suzukii	AU1	N/A	Dsuz22	This study
Drosophila suzukii	AU3	N/A	Dsuz22	This study
Drosophila suzukii	AU4	N/A	Dsuz22	This study
Drosophila suzukii	AU5	N/A	Dsuz22	This study
Drosophila suzukii	BZ1	N/A	Dsuz22	This study
Drosophila suzukii	BZ3	N/A	Dsuz22	This study
Drosophila suzukii	BZ4	N/A	Dsuz22	This study
Drosophila suzukii	DD2	N/A	Dsuz22	This study
Drosophila suzukii	IR1	N/A	Dsuz22	This study
Drosophila suzukii	IR2	N/A	Dsuz22	This study
Drosophila suzukii	IR3	N/A	Dsuz22	This study
Drosophila suzukii	IR4	N/A	Dsuz22	This study
Drosophila suzukii	IR5	N/A	Dsuz22	This study
Drosophila suzukii	IR6	N/A	Dsuz22	This study
Drosophila suzukii	IR7	N/A	Dsuz22	This study
Drosophila suzukii	SN10	N/A	Dsuz22	This study
Drosophila suzukii	SH8	N/A	Dsuz23	This study
Drosophila suzukii	AB824808.1	AB824808.1	Dsuz24	Katoh et al, 20157
Drosophila suzukii	AB824809.1	AB824809.1	Dsuz25	Katoh et al, 20157
Drosophila suzukii	AB824816.1	AB824816.1	Dsuz26	Katoh et al, 20157
Drosophila suzukii	AB824818.1	AB824818.1	Dsuz27	Katoh et al, 20157
Drosophila suzukii	AB824821.1	AB824821.1	Dsuz28	Katoh et al, 20157
Drosophila suzukii	AB824817.1	AB824817.1	Dsuz29	Katoh et al, 20157
Drosophila suzukii	SN8	N/A	Dsuz30	This study
Drosophila suzukii	SN9	N/A	Dsuz31	This study
Drosophila suzukii	AB824806.1	AB824806.1	Dsuz32	Katoh et al, 20157
Drosophila suzukii	SN3	N/A	Dsuz33	This study
Drosophila suzukii	SN4	N/A	Dsuz33	This study
Drosophila suzukii	NM4	N/A	Dsuz33	This study
Drosophila suzukii	MH2	N/A	Dsuz33	This study
Drosophila suzukii	CT7	N/A	Dsuz33	This study
Drosophila suzukii	TW5	N/A	Dsuz33	This study
Drosophila suzukii	TW7	N/A	Dsuz33	This study
Drosophila suzukii	SH1	N/A	Dsuz33	This study
Drosophila suzukii	SH3	N/A	Dsuz33	This study
Drosophila suzukii	SH5	N/A	Dsuz33	This study
Drosophila suzukii	OX6	N/A	Dsuz33	This study
Drosophila suzukii	OX7	N/A	Dsuz33	This study
Drosophila suzukii	OX8	N/A	Dsuz33	This study
Drosophila suzukii	PM4	N/A	Dsuz33	This study
Drosophila suzukii	CF3	N/A	Dsuz33	This study
Drosophila suzukii	LS4	N/A	Dsuz33	This study
Drosophila suzukii	SR3	N/A	Dsuz33	This study
Drosophila suzukii	SQ3	N/A	Dsuz33	This study
Drosophila suzukii	AB4	N/A	Dsuz33	This study
Drosophila suzukii	VB3	N/A	Dsuz33	This study
Drosophila suzukii	AU2	N/A	Dsuz33	This study
Drosophila suzukii	AL3	N/A	Dsuz33	This study
Drosophila suzukii	BZ5	N/A	Dsuz33	This study
Drosophila suzukii	DD1	N/A	Dsuz33	This study
Drosophila suzukii	SN7	N/A	Dsuz33	This study
Drosophila suzukii	AB824820.1	AB824820.1	Dsuz34	Katoh et al, 20157
Drosophila suzukii	BL3	N/A	Dsuz35	This study
Drosophila suzukii	BL4	N/A	Dsuz35	This study
Drosophila suzukii	BL5	N/A	Dsuz35	This study
Drosophila suzukii	LR2	N/A	Dsuz35	This study
Drosophila suzukii	LR3	N/A	Dsuz35	This study
Drosophila suzukii	LR4	N/A	Dsuz35	This study
Drosophila suzukii	WV1	N/A	Dsuz35	This study
Drosophila suzukii	WV3	N/A	Dsuz35	This study
Drosophila suzukii	CT8	N/A	Dsuz35	This study
Drosophila suzukii	TW1	N/A	Dsuz35	This study
Drosophila suzukii	CH5	N/A	Dsuz35	This study
Drosophila suzukii	CH8	N/A	Dsuz35	This study
Drosophila suzukii	CF5	N/A	Dsuz35	This study
Drosophila suzukii	LS7	N/A	Dsuz35	This study
Drosophila suzukii	MR3	N/A	Dsuz35	This study
Drosophila suzukii	MR5	N/A	Dsuz35	This study
Drosophila suzukii	MR7	N/A	Dsuz35	This study
Drosophila suzukii	VB2	N/A	Dsuz35	This study
Drosophila suzukii	OW1	N/A	Dsuz35	This study
Drosophila suzukii	KS1	N/A	Dsuz35	This study
Drosophila suzukii	KS2	N/A	Dsuz35	This study
Drosophila suzukii	KS3	N/A	Dsuz35	This study
Drosophila suzukii	KS4	N/A	Dsuz35	This study
Drosophila suzukii	KS5	N/A	Dsuz35	This study
Drosophila suzukii	AR1	N/A	Dsuz35	This study
Drosophila suzukii	AR3	N/A	Dsuz35	This study
Drosophila suzukii	AR5	N/A	Dsuz35	This study
Drosophila suzukii	IT1	N/A	Dsuz35	This study
Drosophila suzukii	ST1	N/A	Dsuz35	This study
Drosophila suzukii	FG1	N/A	Dsuz35	This study
Drosophila suzukii	WP4	N/A	Dsuz35	This study
Drosophila suzukii	NY1	N/A	Dsuz35	This study
Drosophila suzukii	NY2	N/A	Dsuz35	This study
Drosophila suzukii	NY3	N/A	Dsuz35	This study
Drosophila suzukii	NY4	N/A	Dsuz35	This study
Drosophila suzukii	NY5	N/A	Dsuz35	This study
Drosophila suzukii	BZ2	N/A	Dsuz35	This study
Drosophila suzukii	BD2	N/A	Dsuz35	This study
Drosophila suzukii	BD4	N/A	Dsuz35	This study
Drosophila suzukii	BD5	N/A	Dsuz35	This study
Drosophila suzukii	DA1	N/A	Dsuz35	This study
Drosophila suzukii	DA2	N/A	Dsuz35	This study
Drosophila suzukii	DA5	N/A	Dsuz35	This study
Drosophila suzukii	NV1	N/A	Dsuz35	This study
Drosophila suzukii	NV2	N/A	Dsuz35	This study
Drosophila suzukii	NV3	N/A	Dsuz35	This study
Drosophila suzukii	NV4	N/A	Dsuz35	This study
Drosophila suzukii	NV5	N/A	Dsuz35	This study
Drosophila suzukii	KU588141.1:3090-3774	KU588141.1	Dsuz36	Kim et al, 20169
1. O’Grady, P. M., and M. G. Kidwell, 2002 Phylogeny of the subgenus sophophora (Diptera: drosophilidae) based on combined analysis of nuclear and mitochondrial sequences. Mol Phylogenet Evol 22: 442–453.
2. Schawaroch, V., 2002 Phylogeny of a paradigm lineage: the Drosophila melanogaster species group (Diptera: Drosophilidae). Biological Journal of the Linnean Society 76: 21–37.
3. Larkin, A., S. J. Marygold, G. Antonazzo, H. Attrill, G. dos Santos et al., 2021 FlyBase: updates to the Drosophila melanogaster knowledge base. Nucleic Acids Research 49: D899–D907.
4. Sarswat, M., S. Dewan, and R. S. Fartyal, 2016 Mitochondrial DNA sequence variation in Drosophilid species (Diptera: Drosophilidae) along altitudinal gradient from Central Himalayan region of India. J Genet 95: 357–367.
5. Durkin, S. M., M. Chakraborty, A. Abrieux, K. M. Lewald, A. Gadau et al., 2021 Behavioral and Genomic Sensory Adaptations Underlying the Pest Activity of Drosophila suzukii. Molecular Biology and Evolution.
6. Yang, Y., Z.-C. Hou, Y.-H. Qian, H. Kang, and Q.-T. Zeng, 2012 Increasing the data size to accurately reconstruct the phylogenetic relationships between nine subgroups of the Drosophila melanogaster species group (Drosophilidae, Diptera). Mol Phylogenet Evol 62: 214–223.
7. Katoh, T. K., M. Komoda, and M. Watada, 2015 A survey of the drosophilid fauna and genetic diversity of two dominant species of Drosophila in Ehime prefecture, Japan. Biogeography.
8. Tritto, P., R. Antonacci, L. Fanti, L. Piacentini, and M. Berloco, 2015 D.suzukii is one of the most abundant species among the drosophilid populations present in Apulia (Italy). Unpublished.
9. Kim, J. S., M. J. Kim, D.-S. Choi, and I. Kim, 2016 Complete mitochondrial genome of the spotted-wing drosophila, Drosophila suzukii (Diptera: Drosophilidae). Mitochondrial DNA B Resour 1: 222–223.
