# Supplementary material
Source: publisher figshare collection journal article supplement (https://gsajournals.figshare.com/ndownloader/files/30838336)
Supplement: Supplementary file 3 [file 30838336 › G3-2021-402773_SuppMaterials/Table S3.xlsx]

## Sheet: threepop-k500
Table S3: F3 statistics estimated by treemix between all combinations of populations.
PopA	PopB	PopC	F3	Standard Error	Z-score
Brazil	D. biarmipes	D. subpulchrella	0.0175627	0.00142378	12.3352
D. biarmipes	Brazil	D. subpulchrella	0.0140428	0.00128788	10.9038
D. subpulchrella	Brazil	D. biarmipes	0.0143996	0.0012907	11.1564
Brazil	D. biarmipes	East_US	-0.000276624	0.000573362	-0.482459
D. biarmipes	Brazil	East_US	0.0318821	0.00202093	15.776
East_US	Brazil	D. biarmipes	0.00484077	0.00051881	9.33053
Brazil	D. biarmipes	Hawaii	0.00284922	0.000880832	3.23469
D. biarmipes	Brazil	Hawaii	0.0287563	0.00211354	13.6057
Hawaii	Brazil	D. biarmipes	0.0710026	0.00464443	15.2877
Brazil	D. biarmipes	Ireland	0.00553319	0.00070306	7.87015
D. biarmipes	Brazil	Ireland	0.0260723	0.00196022	13.3007
Ireland	Brazil	D. biarmipes	0.00969658	0.000808553	11.9925
Brazil	D. biarmipes	Italy	0.00800495	0.000845101	9.47218
D. biarmipes	Brazil	Italy	0.0236005	0.00196392	12.017
Italy	Brazil	D. biarmipes	0.00672336	0.000735026	9.1471
Brazil	D. biarmipes	Japan	0.00732946	0.000721276	10.1618
D. biarmipes	Brazil	Japan	0.024276	0.00199089	12.1936
Japan	Brazil	D. biarmipes	0.0241247	0.00249047	9.68679
Brazil	D. biarmipes	S.Korea	0.00575313	0.000804273	7.15321
D. biarmipes	Brazil	S.Korea	0.0258523	0.00185297	13.9518
S.Korea	Brazil	D. biarmipes	0.000888896	0.000300664	2.95645
Brazil	D. biarmipes	West_US	0.00227679	0.000701096	3.24748
D. biarmipes	Brazil	West_US	0.0293287	0.00193638	15.1461
West_US	Brazil	D. biarmipes	0.00543814	0.000465998	11.6699
Brazil	D. subpulchrella	East_US	-0.000325114	0.000562585	-0.577892
D. subpulchrella	Brazil	East_US	0.0322874	0.00205039	15.747
East_US	Brazil	D. subpulchrella	0.00488926	0.000488572	10.0072
Brazil	D. subpulchrella	Hawaii	0.00325693	0.000938167	3.47159
D. subpulchrella	Brazil	Hawaii	0.0287054	0.00207141	13.8579
Hawaii	Brazil	D. subpulchrella	0.0705948	0.00454593	15.5293
Brazil	D. subpulchrella	Ireland	0.00556176	0.000720933	7.71467
D. subpulchrella	Brazil	Ireland	0.0264005	0.00195689	13.4911
Ireland	Brazil	D. subpulchrella	0.00966801	0.000788436	12.2623
Brazil	D. subpulchrella	Italy	0.00840894	0.000844525	9.957
D. subpulchrella	Brazil	Italy	0.0235534	0.0019105	12.3284
Italy	Brazil	D. subpulchrella	0.00631937	0.000682001	9.26592
Brazil	D. subpulchrella	Japan	0.00724554	0.000737454	9.82507
D. subpulchrella	Brazil	Japan	0.0247168	0.00201642	12.2577
Japan	Brazil	D. subpulchrella	0.0242086	0.00246487	9.82142
Brazil	D. subpulchrella	S.Korea	0.00593599	0.00077906	7.61943
D. subpulchrella	Brazil	S.Korea	0.0260263	0.00183911	14.1515
S.Korea	Brazil	D. subpulchrella	0.000706035	0.000248975	2.83576
Brazil	D. subpulchrella	West_US	0.00233519	0.000691313	3.37791
D. subpulchrella	Brazil	West_US	0.0296271	0.00192304	15.4064
West_US	Brazil	D. subpulchrella	0.00537974	0.000467355	11.511
Brazil	East_US	Hawaii	0.000613598	0.00079564	0.771201
East_US	Brazil	Hawaii	0.00395055	0.000717697	5.50448
Hawaii	Brazil	East_US	0.0732382	0.00441644	16.5831
Brazil	East_US	Ireland	-0.000186974	0.000559424	-0.334226
East_US	Brazil	Ireland	0.00475112	0.000492613	9.64472
Ireland	Brazil	East_US	0.0154167	0.00091013	16.9391
Brazil	East_US	Italy	-0.000393074	0.000567549	-0.692583
East_US	Brazil	Italy	0.00495722	0.000499933	9.91577
Italy	Brazil	East_US	0.0151214	0.000859625	17.5907
Brazil	East_US	Japan	9.8192e-05	0.000543755	0.180581
East_US	Brazil	Japan	0.00446595	0.000530131	8.42424
Japan	Brazil	East_US	0.0313559	0.00241763	12.9697
Brazil	East_US	S.Korea	0.000208349	0.000483714	0.430726
East_US	Brazil	S.Korea	0.00435579	0.0004255	10.2369
S.Korea	Brazil	East_US	0.00643368	0.000474949	13.546
Brazil	East_US	West_US	0.000544034	0.00034771	1.56462
East_US	Brazil	West_US	0.00402011	0.00032067	12.5366
West_US	Brazil	East_US	0.0071709	0.000534874	13.4067
Brazil	Hawaii	Ireland	0.00225688	0.000877873	2.57085
Hawaii	Brazil	Ireland	0.0715949	0.00468714	15.2748
Ireland	Brazil	Hawaii	0.0129729	0.00108847	11.9184
Brazil	Hawaii	Italy	0.00420534	0.000922078	4.56072
Hawaii	Brazil	Italy	0.0696464	0.00454637	15.3191
Italy	Brazil	Hawaii	0.010523	0.00100168	10.5054
Brazil	Hawaii	Japan	0.00454138	0.00082034	5.53598
Hawaii	Brazil	Japan	0.0693104	0.00465798	14.8799
Japan	Brazil	Hawaii	0.0269127	0.00226018	11.9074
Brazil	Hawaii	S.Korea	0.00381248	0.000887796	4.29432
Hawaii	Brazil	S.Korea	0.0700393	0.00462562	15.1416
S.Korea	Brazil	Hawaii	0.00282955	0.000555347	5.09509
Brazil	Hawaii	West_US	0.0115415	0.00129186	8.93403
Hawaii	Brazil	West_US	0.0623102	0.00388583	16.0352
West_US	Brazil	Hawaii	-0.00382661	0.000985915	-3.88128
Brazil	Ireland	Italy	0.00982979	0.000958933	10.2507
Ireland	Brazil	Italy	0.00539999	0.000715435	7.54784
Italy	Brazil	Ireland	0.00489852	0.000544794	8.99151
Brazil	Ireland	Japan	0.00520805	0.000670269	7.77008
Ireland	Brazil	Japan	0.0100217	0.000801491	12.5039
Japan	Brazil	Ireland	0.0262461	0.00247884	10.588
Brazil	Ireland	S.Korea	0.00549229	0.000703671	7.8052
Ireland	Brazil	S.Korea	0.00973748	0.000737227	13.2082
S.Korea	Brazil	Ireland	0.00114973	0.000357443	3.21655
Brazil	Ireland	West_US	0.00146392	0.000633597	2.31049
Ireland	Brazil	West_US	0.0137659	0.000847974	16.2338
West_US	Brazil	Ireland	0.00625102	0.000520066	12.0197
Brazil	Italy	Japan	0.00739161	0.000738281	10.0119
Italy	Brazil	Japan	0.0073367	0.000752156	9.75423
Japan	Brazil	Italy	0.0240625	0.0024883	9.67027
Brazil	Italy	S.Korea	0.0066337	0.000805326	8.23729
Italy	Brazil	S.Korea	0.0080946	0.000598086	13.5342
S.Korea	Brazil	Italy	8.32188e-06	0.000200304	0.0415462
Brazil	Italy	West_US	0.00235465	0.000694639	3.38975
Italy	Brazil	West_US	0.0123737	0.000759945	16.2823
West_US	Brazil	Italy	0.00536028	0.000450976	11.886
Brazil	Japan	S.Korea	0.00694521	0.000784086	8.85772
Japan	Brazil	S.Korea	0.0245089	0.00219346	11.1736
S.Korea	Brazil	Japan	-0.000303189	0.000219239	-1.38292
Brazil	Japan	West_US	0.00324944	0.000722435	4.4979
Japan	Brazil	West_US	0.0282047	0.00221727	12.7204
West_US	Brazil	Japan	0.00446549	0.000343821	12.9878
Brazil	S.Korea	West_US	0.00339216	0.000683125	4.96565
S.Korea	Brazil	West_US	0.00324986	0.000293671	11.0663
West_US	Brazil	S.Korea	0.00432277	0.000311105	13.8949
D. biarmipes	D. subpulchrella	East_US	0.0139943	0.00128038	10.9299
D. subpulchrella	D. biarmipes	East_US	0.0144481	0.00130714	11.0533
East_US	D. biarmipes	D. subpulchrella	0.0227285	0.000813792	27.9292
D. biarmipes	D. subpulchrella	Hawaii	0.0144505	0.00131155	11.0179
D. subpulchrella	D. biarmipes	Hawaii	0.0139919	0.00135105	10.3564
Hawaii	D. biarmipes	D. subpulchrella	0.0853083	0.005049	16.8961
D. biarmipes	D. subpulchrella	Ireland	0.0140714	0.00128931	10.9139
D. subpulchrella	D. biarmipes	Ireland	0.0143711	0.00130103	11.0459
Ireland	D. biarmipes	D. subpulchrella	0.0216975	0.00145649	14.8971
D. biarmipes	D. subpulchrella	Italy	0.0144468	0.00133996	10.7816
D. subpulchrella	D. biarmipes	Italy	0.0139956	0.00125777	11.1273
Italy	D. biarmipes	D. subpulchrella	0.0158771	0.00142884	11.1119
D. biarmipes	D. subpulchrella	Japan	0.0139589	0.00129801	10.754
D. subpulchrella	D. biarmipes	Japan	0.0144836	0.00130807	11.0725
Japan	D. biarmipes	D. subpulchrella	0.0344418	0.00314579	10.9485
D. biarmipes	D. subpulchrella	S.Korea	0.0142257	0.00130853	10.8715
D. subpulchrella	D. biarmipes	S.Korea	0.0142168	0.00129518	10.9767
S.Korea	D. biarmipes	D. subpulchrella	0.0125156	0.00091493	13.6793
D. biarmipes	D. subpulchrella	West_US	0.0141012	0.00129598	10.8807
D. subpulchrella	D. biarmipes	West_US	0.0143412	0.00129496	11.0747
West_US	D. biarmipes	D. subpulchrella	0.0206656	0.000975795	21.1782
D. biarmipes	East_US	Hawaii	0.0296465	0.0017738	16.7135
East_US	D. biarmipes	Hawaii	0.00707639	0.000731135	9.67863
Hawaii	D. biarmipes	East_US	0.0701123	0.00449392	15.6016
D. biarmipes	East_US	Ireland	0.0261619	0.00194835	13.4277
East_US	D. biarmipes	Ireland	0.0105609	0.000564219	18.7178
Ireland	D. biarmipes	East_US	0.00960693	0.000780333	12.3113
D. biarmipes	East_US	Italy	0.0234841	0.00191442	12.267
East_US	D. biarmipes	Italy	0.0132388	0.000550615	24.0436
Italy	D. biarmipes	East_US	0.00683981	0.000750675	9.11155
D. biarmipes	East_US	Japan	0.0246508	0.00197515	12.4805
East_US	D. biarmipes	Japan	0.012072	0.000594057	20.3213
Japan	D. biarmipes	East_US	0.0237498	0.00245962	9.65589
D. biarmipes	East_US	S.Korea	0.0263373	0.00178094	14.7884
East_US	D. biarmipes	S.Korea	0.0103855	0.000393406	26.399
S.Korea	D. biarmipes	East_US	0.000403923	0.000301704	1.33881
D. biarmipes	East_US	West_US	0.0301493	0.00168042	17.9416
East_US	D. biarmipes	West_US	0.00657353	0.000319734	20.5594
West_US	D. biarmipes	East_US	0.00461749	0.000482718	9.56559
D. biarmipes	Hawaii	Ireland	0.0254799	0.00205185	12.418
Hawaii	D. biarmipes	Ireland	0.0742789	0.00486638	15.2637
Ireland	D. biarmipes	Hawaii	0.0102889	0.000850333	12.0999
D. biarmipes	Hawaii	Italy	0.0249567	0.00200616	12.44
Hawaii	D. biarmipes	Italy	0.0748022	0.00486798	15.3661
Italy	D. biarmipes	Hawaii	0.00536724	0.000754868	7.11016
D. biarmipes	Hawaii	Japan	0.0259682	0.00212451	12.2231
Hawaii	D. biarmipes	Japan	0.0737906	0.00489394	15.078
Japan	D. biarmipes	Hawaii	0.0224325	0.00224239	10.0038
D. biarmipes	Hawaii	S.Korea	0.0268156	0.00205411	13.0546
Hawaii	D. biarmipes	S.Korea	0.0729432	0.00481336	15.1543
S.Korea	D. biarmipes	Hawaii	-7.43661e-05	0.00032782	-0.22685
D. biarmipes	Hawaii	West_US	0.038021	0.00219102	17.3531
Hawaii	D. biarmipes	West_US	0.0617378	0.0039607	15.5876
West_US	D. biarmipes	Hawaii	-0.00325418	0.000991357	-3.28256
D. biarmipes	Ireland	Italy	0.0278971	0.00225577	12.367
Ireland	D. biarmipes	Italy	0.00787174	0.000869262	9.05566
Italy	D. biarmipes	Ireland	0.00242677	0.000476272	5.09534
D. biarmipes	Ireland	Japan	0.0239509	0.00197479	12.1283
Ireland	D. biarmipes	Japan	0.011818	0.00087214	13.5506
Japan	D. biarmipes	Ireland	0.0244498	0.00251725	9.71292
D. biarmipes	Ireland	S.Korea	0.0258114	0.00188012	13.7286
Ireland	D. biarmipes	S.Korea	0.00995742	0.000823523	12.0913
S.Korea	D. biarmipes	Ireland	0.000929795	0.000296299	3.13803
D. biarmipes	Ireland	West_US	0.0252594	0.00188958	13.3677
Ireland	D. biarmipes	West_US	0.0105095	0.000819437	12.8252
West_US	D. biarmipes	Ireland	0.00950741	0.000538344	17.6605
D. biarmipes	Italy	Japan	0.0236627	0.00195996	12.0731
Italy	D. biarmipes	Japan	0.00666121	0.000785556	8.47961
Japan	D. biarmipes	Italy	0.024738	0.00248029	9.97381
D. biarmipes	Italy	S.Korea	0.0244811	0.00201141	12.1711
Italy	D. biarmipes	S.Korea	0.00584279	0.000659422	8.86047
S.Korea	D. biarmipes	Italy	0.00226014	0.000330501	6.83853
D. biarmipes	Italy	West_US	0.0236784	0.00194161	12.1952
Italy	D. biarmipes	West_US	0.0066455	0.000742256	8.95312
West_US	D. biarmipes	Italy	0.0110884	0.000618923	17.9157
D. biarmipes	Japan	S.Korea	0.0254681	0.00206036	12.361
Japan	D. biarmipes	S.Korea	0.0229326	0.00232704	9.85484
S.Korea	D. biarmipes	Japan	0.00127314	0.000369979	3.44111
D. biarmipes	Japan	West_US	0.0252487	0.00207566	12.1642
Japan	D. biarmipes	West_US	0.023152	0.00230399	10.0486
West_US	D. biarmipes	Japan	0.00951816	0.000576198	16.5189
D. biarmipes	S.Korea	West_US	0.0269677	0.00188619	14.2974
S.Korea	D. biarmipes	West_US	-0.000226474	0.000212923	-1.06364
West_US	D. biarmipes	S.Korea	0.00779911	0.000379265	20.5637
D. subpulchrella	East_US	Hawaii	0.0296441	0.00176557	16.7901
East_US	D. subpulchrella	Hawaii	0.00753259	0.00069029	10.9122
Hawaii	D. subpulchrella	East_US	0.0696561	0.00439838	15.8368
D. subpulchrella	East_US	Ireland	0.0265387	0.001964	13.5125
East_US	D. subpulchrella	Ireland	0.010638	0.000561078	18.9599
Ireland	D. subpulchrella	East_US	0.00952987	0.000775799	12.2839
D. subpulchrella	East_US	Italy	0.0234854	0.00188009	12.4916
East_US	D. subpulchrella	Italy	0.0136913	0.000493874	27.7222
Italy	D. subpulchrella	East_US	0.00638733	0.000711865	8.97267
D. subpulchrella	East_US	Japan	0.0251401	0.00201795	12.4582
East_US	D. subpulchrella	Japan	0.0120366	0.000572724	21.0164
Japan	D. subpulchrella	East_US	0.0237853	0.00241922	9.8318
D. subpulchrella	East_US	S.Korea	0.0265598	0.00178894	14.8466
East_US	D. subpulchrella	S.Korea	0.0106169	0.000333683	31.8173
S.Korea	D. subpulchrella	East_US	0.000172573	0.000278589	0.619452
D. subpulchrella	East_US	West_US	0.0304963	0.0017035	17.9021
East_US	D. subpulchrella	West_US	0.00668041	0.000291533	22.9148
West_US	D. subpulchrella	East_US	0.0045106	0.000468011	9.6378
D. subpulchrella	Hawaii	Ireland	0.0254005	0.00201477	12.6071
Hawaii	D. subpulchrella	Ireland	0.0738997	0.00477775	15.4675
Ireland	D. subpulchrella	Hawaii	0.0106681	0.000927669	11.4999
D. subpulchrella	Hawaii	Italy	0.0245018	0.00194962	12.5675
Hawaii	D. subpulchrella	Italy	0.0747984	0.00475742	15.7225
Italy	D. subpulchrella	Hawaii	0.00537095	0.0007538	7.12516
D. subpulchrella	Hawaii	Japan	0.0260012	0.00213023	12.2058
Hawaii	D. subpulchrella	Japan	0.073299	0.00477399	15.3538
Japan	D. subpulchrella	Hawaii	0.0229241	0.00225216	10.1787
D. subpulchrella	Hawaii	S.Korea	0.0265819	0.0020397	13.0323
Hawaii	D. subpulchrella	S.Korea	0.0727184	0.00470338	15.4609
S.Korea	D. subpulchrella	Hawaii	0.000150483	0.000424817	0.354231
D. subpulchrella	Hawaii	West_US	0.0379117	0.00215245	17.6133
Hawaii	D. subpulchrella	West_US	0.0613885	0.00386288	15.8919
West_US	D. subpulchrella	Hawaii	-0.00290487	0.000927036	-3.1335
D. subpulchrella	Ireland	Italy	0.0278214	0.00220591	12.6122
Ireland	D. subpulchrella	Italy	0.00824717	0.000854043	9.65662
Italy	D. subpulchrella	Ireland	0.00205134	0.000494686	4.14676
D. subpulchrella	Ireland	Japan	0.024363	0.00200709	12.1385
Ireland	D. subpulchrella	Japan	0.0117055	0.000862081	13.5782
Japan	D. subpulchrella	Ireland	0.0245623	0.00248454	9.88606
D. subpulchrella	Ireland	S.Korea	0.0259568	0.00186676	13.9048
Ireland	D. subpulchrella	S.Korea	0.0101117	0.000821985	12.3016
S.Korea	D. subpulchrella	Ireland	0.000775505	0.000269121	2.88162
D. subpulchrella	Ireland	West_US	0.0255293	0.00187603	13.6081
Ireland	D. subpulchrella	West_US	0.0105393	0.000806145	13.0737
West_US	D. subpulchrella	Ireland	0.00947759	0.000489619	19.3571
D. subpulchrella	Italy	Japan	0.0236994	0.00195535	12.1203
Italy	D. subpulchrella	Japan	0.0061733	0.000758861	8.13495
Japan	D. subpulchrella	Italy	0.0252259	0.00250809	10.0578
D. subpulchrella	Italy	S.Korea	0.0242511	0.00195228	12.4219
Italy	D. subpulchrella	S.Korea	0.00562166	0.000637504	8.81823
S.Korea	D. subpulchrella	Italy	0.00248127	0.000360081	6.89086
D. subpulchrella	Italy	West_US	0.0235728	0.00189828	12.418
Italy	D. subpulchrella	West_US	0.00629991	0.000701839	8.97629
West_US	D. subpulchrella	Italy	0.011434	0.000589505	19.396
D. subpulchrella	Japan	S.Korea	0.025726	0.00206969	12.4298
Japan	D. subpulchrella	S.Korea	0.0231993	0.00233937	9.91693
S.Korea	D. subpulchrella	Japan	0.00100636	0.000377241	2.66769
D. subpulchrella	Japan	West_US	0.025631	0.00210124	12.198
Japan	D. subpulchrella	West_US	0.0232943	0.00228871	10.1779
West_US	D. subpulchrella	Japan	0.00937584	0.000576695	16.2579
D. subpulchrella	S.Korea	West_US	0.0270833	0.00188037	14.4031
S.Korea	D. subpulchrella	West_US	-0.000350936	0.000205151	-1.71062
West_US	D. subpulchrella	S.Korea	0.00792357	0.000383639	20.6537
East_US	Hawaii	Ireland	0.0063944	0.00086752	7.37089
Hawaii	East_US	Ireland	0.0707943	0.0045389	15.5973
Ireland	East_US	Hawaii	0.0137735	0.0010849	12.6957
East_US	Hawaii	Italy	0.00854896	0.000670482	12.7505
Hawaii	East_US	Italy	0.0686398	0.00441406	15.5503
Italy	East_US	Hawaii	0.0115296	0.000837922	13.7598
East_US	Hawaii	Japan	0.00839373	0.000696633	12.049
Hawaii	East_US	Japan	0.068795	0.00449756	15.2961
Japan	East_US	Hawaii	0.0274281	0.00203098	13.5049
East_US	Hawaii	S.Korea	0.00755468	0.000664078	11.3762
Hawaii	East_US	S.Korea	0.069634	0.00439681	15.8374
S.Korea	East_US	Hawaii	0.0032348	0.000607084	5.32842
East_US	Hawaii	West_US	0.0149481	0.000758819	19.6991
Hawaii	East_US	West_US	0.0622407	0.00362582	17.1659
West_US	East_US	Hawaii	-0.00375704	0.000641373	-5.85781
East_US	Ireland	Italy	0.014974	0.000574177	26.079
Ireland	East_US	Italy	0.00519389	0.000709478	7.32072
Italy	East_US	Ireland	0.00510462	0.00056362	9.05686
East_US	Ireland	Japan	0.00986097	0.000557397	17.6911
Ireland	East_US	Japan	0.0103069	0.000831999	12.3881
Japan	East_US	Ireland	0.0259609	0.00243751	10.6506
East_US	Ireland	S.Korea	0.0100351	0.000458833	21.8708
Ireland	East_US	S.Korea	0.0101328	0.000670263	15.1177
S.Korea	East_US	Ireland	0.000754411	0.000389938	1.93469
East_US	Ireland	West_US	0.005671	0.000416546	13.6144
Ireland	East_US	West_US	0.0144969	0.000661674	21.9094
West_US	East_US	Ireland	0.00552001	0.000557194	9.90679
East_US	Italy	Japan	0.0122506	0.0005298	23.1231
Italy	East_US	Japan	0.00782797	0.000760865	10.2882
Japan	East_US	Italy	0.0235712	0.00242218	9.73142
East_US	Italy	S.Korea	0.0113826	0.000350811	32.4465
Italy	East_US	S.Korea	0.00869603	0.000549392	15.8284
S.Korea	East_US	Italy	-0.000593101	0.000213731	-2.775
East_US	Italy	West_US	0.00676784	0.000315089	21.4791
Italy	East_US	West_US	0.0133108	0.000566572	23.4935
West_US	East_US	Italy	0.00442317	0.000442223	10.0021
East_US	Japan	S.Korea	0.0112028	0.000345005	32.4715
Japan	East_US	S.Korea	0.0246191	0.00213543	11.5288
S.Korea	East_US	Japan	-0.000413346	0.000239497	-1.72589
East_US	Japan	West_US	0.00717136	0.000321441	22.3101
Japan	East_US	West_US	0.0286505	0.00202708	14.1339
West_US	East_US	Japan	0.00401965	0.000424375	9.47193
East_US	S.Korea	West_US	0.00720392	0.000276665	26.0384
S.Korea	East_US	West_US	0.00358555	0.000196335	18.2624
West_US	East_US	S.Korea	0.00398709	0.000320949	12.4228
Hawaii	Ireland	Italy	0.0772193	0.00483497	15.971
Ireland	Hawaii	Italy	0.00734846	0.000834351	8.80739
Italy	Hawaii	Ireland	0.00295005	0.000660925	4.46352
Hawaii	Ireland	Japan	0.0722616	0.0048741	14.8256
Ireland	Hawaii	Japan	0.0123062	0.000984237	12.5033
Japan	Hawaii	Ireland	0.0239616	0.00234154	10.2333
Hawaii	Ireland	S.Korea	0.0732747	0.0048819	15.0095
Ireland	Hawaii	S.Korea	0.0112931	0.000926953	12.183
S.Korea	Hawaii	Ireland	-0.000405868	0.000474252	-0.855807
Hawaii	Ireland	West_US	0.0615173	0.00400028	15.3782
Ireland	Hawaii	West_US	0.0230505	0.0016328	14.1171
West_US	Hawaii	Ireland	-0.00303365	0.00107443	-2.8235
Hawaii	Italy	Japan	0.0724967	0.00483218	15.0029
Italy	Hawaii	Japan	0.00767274	0.000857322	8.94965
Japan	Hawaii	Italy	0.0237265	0.0023077	10.2814
Hawaii	Italy	S.Korea	0.0724676	0.00471081	15.3833
Italy	Hawaii	S.Korea	0.00770174	0.000819023	9.40357
S.Korea	Hawaii	Italy	0.000401187	0.000363144	1.10476
Hawaii	Italy	West_US	0.0604595	0.00387661	15.596
Italy	Hawaii	West_US	0.0197099	0.00143969	13.6903
West_US	Hawaii	Italy	-0.00197592	0.000945322	-2.09021
Hawaii	Japan	S.Korea	0.0724431	0.00478144	15.1509
Japan	Hawaii	S.Korea	0.02378	0.00221281	10.7465
S.Korea	Hawaii	Japan	0.000425712	0.000338707	1.25687
Hawaii	Japan	West_US	0.0610183	0.00390013	15.6452
Japan	Hawaii	West_US	0.0352048	0.00219613	16.0304
West_US	Hawaii	Japan	-0.00253467	0.000923201	-2.74553
Hawaii	S.Korea	West_US	0.0618899	0.00390501	15.8488
S.Korea	Hawaii	West_US	0.0109789	0.00109886	9.99123
West_US	Hawaii	S.Korea	-0.00340629	0.000933218	-3.65005
Ireland	Italy	Japan	0.00758355	0.000792834	9.56512
Italy	Ireland	Japan	0.00271496	0.000497298	5.45942
Japan	Ireland	Italy	0.0286842	0.00278127	10.3134
Ireland	Italy	S.Korea	0.0065414	0.000743896	8.79343
Italy	Ireland	S.Korea	0.00375711	0.000469272	8.00625
S.Korea	Ireland	Italy	0.00434582	0.000533928	8.13933
Ireland	Italy	West_US	0.00629072	0.000725485	8.67105
Italy	Ireland	West_US	0.00400779	0.00051593	7.76808
West_US	Ireland	Italy	0.0137261	0.000710016	19.3322
Ireland	Japan	S.Korea	0.0114746	0.000887922	12.923
Japan	Ireland	S.Korea	0.0247931	0.00224727	11.0326
S.Korea	Ireland	Japan	-0.000587432	0.000234536	-2.50465
Ireland	Japan	West_US	0.0118073	0.000894083	13.206
Japan	Ireland	West_US	0.0244605	0.00221552	11.0406
West_US	Ireland	Japan	0.00820962	0.000428113	19.1763
Ireland	S.Korea	West_US	0.0116657	0.000787841	14.8072
S.Korea	Ireland	West_US	-0.000778509	0.000222449	-3.49973
West_US	Ireland	S.Korea	0.00835115	0.000397142	21.0281
Italy	Japan	S.Korea	0.00764821	0.000762185	10.0346
Japan	Italy	S.Korea	0.023751	0.00238086	9.97579
S.Korea	Italy	Japan	0.000454716	0.000268112	1.69599
Italy	Japan	West_US	0.00823149	0.000848993	9.69559
Japan	Italy	West_US	0.0231677	0.00230105	10.0683
West_US	Italy	Japan	0.00950245	0.000507222	18.7343
Italy	S.Korea	West_US	0.00913211	0.00064847	14.0826
S.Korea	Italy	West_US	-0.00102919	0.000149737	-6.87329
West_US	Italy	S.Korea	0.00860182	0.000366783	23.4521
Japan	S.Korea	West_US	0.0246516	0.00210893	11.6892
S.Korea	Japan	West_US	-0.000445907	0.000204612	-2.17929
West_US	Japan	S.Korea	0.00801854	0.000371527	21.5827
