# Supplementary material
Source: publisher figshare collection journal article supplement (https://gsajournals.figshare.com/ndownloader/files/30838336)
Supplement: Supplementary file 3 [file 30838336 › G3-2021-402773_SuppMaterials/Table S4.xlsx]

## Sheet: fourpop-k500
Table S4: F4 statistics estimated by treemix between all combinations of populations.
popA	popB	popC	popD	F4	Standard Error	Z-score
Brazil	D. biarmipes	D. subpulchrella	East_US	-0.0178393	0.00100738	-17.7086
Brazil	D. subpulchrella	D. biarmipes	East_US	-0.0178878	0.00101704	-17.5881
Brazil	East_US	D. biarmipes	D. subpulchrella	-4.84899e-05	0.000156444	-0.30995
Brazil	D. biarmipes	D. subpulchrella	Hawaii	-0.0147134	0.00111466	-13.1999
Brazil	D. subpulchrella	D. biarmipes	Hawaii	-0.0143057	0.00112728	-12.6905
Brazil	Hawaii	D. biarmipes	D. subpulchrella	0.00040771	0.000363374	1.12201
Brazil	D. biarmipes	D. subpulchrella	Ireland	-0.0120295	0.000923495	-13.026
Brazil	D. subpulchrella	D. biarmipes	Ireland	-0.0120009	0.000927317	-12.9415
Brazil	Ireland	D. biarmipes	D. subpulchrella	2.85707e-05	0.000192224	0.148633
Brazil	D. biarmipes	D. subpulchrella	Italy	-0.00955772	0.000869697	-10.9897
Brazil	D. subpulchrella	D. biarmipes	Italy	-0.00915372	0.000878397	-10.4209
Brazil	Italy	D. biarmipes	D. subpulchrella	0.000403993	0.000257995	1.56589
Brazil	D. biarmipes	D. subpulchrella	Japan	-0.0102332	0.000958988	-10.6708
Brazil	D. subpulchrella	D. biarmipes	Japan	-0.0103171	0.0009912	-10.4087
Brazil	Japan	D. biarmipes	D. subpulchrella	-8.39151e-05	0.000273668	-0.306631
Brazil	D. biarmipes	D. subpulchrella	S.Korea	-0.0118095	0.000783525	-15.0723
Brazil	D. subpulchrella	D. biarmipes	S.Korea	-0.0116267	0.000801878	-14.4993
Brazil	S.Korea	D. biarmipes	D. subpulchrella	0.000182861	0.000161549	1.13192
Brazil	D. biarmipes	D. subpulchrella	West_US	-0.0152859	0.000891846	-17.1396
Brazil	D. subpulchrella	D. biarmipes	West_US	-0.0152275	0.000893729	-17.0381
Brazil	West_US	D. biarmipes	D. subpulchrella	5.83985e-05	0.000125692	0.464614
Brazil	D. biarmipes	East_US	Hawaii	0.00312584	0.000638689	4.89415
Brazil	East_US	D. biarmipes	Hawaii	0.000890222	0.000698888	1.27377
Brazil	Hawaii	D. biarmipes	East_US	-0.00223562	0.00070348	-3.17794
Brazil	D. biarmipes	East_US	Ireland	0.00580981	0.000388093	14.9702
Brazil	East_US	D. biarmipes	Ireland	8.96494e-05	0.000248325	0.361017
Brazil	Ireland	D. biarmipes	East_US	-0.00572016	0.000424828	-13.4646
Brazil	D. biarmipes	East_US	Italy	0.00828157	0.000468831	17.6643
Brazil	East_US	D. biarmipes	Italy	-0.000116451	0.000211542	-0.550486
Brazil	Italy	D. biarmipes	East_US	-0.00839802	0.000467512	-17.9632
Brazil	D. biarmipes	East_US	Japan	0.00760608	0.000414356	18.3564
Brazil	East_US	D. biarmipes	Japan	0.000374816	0.00022853	1.64012
Brazil	Japan	D. biarmipes	East_US	-0.00723127	0.000422586	-17.1119
Brazil	D. biarmipes	East_US	S.Korea	0.00602975	0.000367174	16.4221
Brazil	East_US	D. biarmipes	S.Korea	0.000484972	0.000216117	2.24403
Brazil	S.Korea	D. biarmipes	East_US	-0.00554478	0.000450039	-12.3207
Brazil	D. biarmipes	East_US	West_US	0.00255342	0.000293129	8.71088
Brazil	East_US	D. biarmipes	West_US	0.000820658	0.000367479	2.23321
Brazil	West_US	D. biarmipes	East_US	-0.00173276	0.000495332	-3.49817
Brazil	D. biarmipes	Hawaii	Ireland	0.00268397	0.000669766	4.00733
Brazil	Hawaii	D. biarmipes	Ireland	-0.000592341	0.000588138	-1.00715
Brazil	Ireland	D. biarmipes	Hawaii	-0.00327631	0.000766332	-4.27532
Brazil	D. biarmipes	Hawaii	Italy	0.00515573	0.000670269	7.69203
Brazil	Hawaii	D. biarmipes	Italy	0.00135613	0.000371385	3.65154
Brazil	Italy	D. biarmipes	Hawaii	-0.0037996	0.000731687	-5.19294
Brazil	D. biarmipes	Hawaii	Japan	0.00448024	0.00066717	6.71529
Brazil	Hawaii	D. biarmipes	Japan	0.00169216	0.000554575	3.05128
Brazil	Japan	D. biarmipes	Hawaii	-0.00278808	0.000723367	-3.8543
Brazil	D. biarmipes	Hawaii	S.Korea	0.00290391	0.000624318	4.65134
Brazil	Hawaii	D. biarmipes	S.Korea	0.000963262	0.000438411	2.19717
Brazil	S.Korea	D. biarmipes	Hawaii	-0.00194065	0.0006406	-3.02943
Brazil	D. biarmipes	Hawaii	West_US	-0.000572425	0.000570678	-1.00306
Brazil	Hawaii	D. biarmipes	West_US	0.00869233	0.00112666	7.71511
Brazil	West_US	D. biarmipes	Hawaii	0.00926475	0.00111602	8.30157
Brazil	D. biarmipes	Ireland	Italy	0.00247176	0.000385426	6.41304
Brazil	Ireland	D. biarmipes	Italy	0.0042966	0.000511796	8.39513
Brazil	Italy	D. biarmipes	Ireland	0.00182484	0.000658286	2.77211
Brazil	D. biarmipes	Ireland	Japan	0.00179627	0.000383959	4.67828
Brazil	Ireland	D. biarmipes	Japan	-0.000325142	0.000297768	-1.09193
Brazil	Japan	D. biarmipes	Ireland	-0.00212141	0.000372174	-5.70005
Brazil	D. biarmipes	Ireland	S.Korea	0.000219939	0.000328677	0.669164
Brazil	Ireland	D. biarmipes	S.Korea	-4.08994e-05	0.000268129	-0.152536
Brazil	S.Korea	D. biarmipes	Ireland	-0.000260838	0.000318757	-0.818299
Brazil	D. biarmipes	Ireland	West_US	-0.0032564	0.000329634	-9.87884
Brazil	Ireland	D. biarmipes	West_US	-0.00406927	0.000305574	-13.3168
Brazil	West_US	D. biarmipes	Ireland	-0.000812874	0.000275078	-2.95506
Brazil	D. biarmipes	Italy	Japan	-0.000675488	0.000410282	-1.6464
Brazil	Italy	D. biarmipes	Japan	-0.000613337	0.000366528	-1.67337
Brazil	Japan	D. biarmipes	Italy	6.21507e-05	0.000328301	0.18931
Brazil	D. biarmipes	Italy	S.Korea	-0.00225182	0.000327694	-6.8717
Brazil	Italy	D. biarmipes	S.Korea	-0.00137124	0.000387986	-3.53426
Brazil	S.Korea	D. biarmipes	Italy	0.000880574	0.000235747	3.73525
Brazil	D. biarmipes	Italy	West_US	-0.00572815	0.0004043	-14.1681
Brazil	Italy	D. biarmipes	West_US	-0.00565029	0.000419156	-13.4802
Brazil	West_US	D. biarmipes	Italy	7.78608e-05	0.000173178	0.4496
Brazil	D. biarmipes	Japan	S.Korea	-0.00157633	0.000384971	-4.09467
Brazil	Japan	D. biarmipes	S.Korea	-0.000384243	0.000419708	-0.9155
Brazil	S.Korea	D. biarmipes	Japan	0.00119209	0.000323287	3.68739
Brazil	D. biarmipes	Japan	West_US	-0.00505266	0.000388775	-12.9964
Brazil	Japan	D. biarmipes	West_US	-0.00408001	0.000514509	-7.92992
Brazil	West_US	D. biarmipes	Japan	0.000972652	0.000343818	2.82897
Brazil	D. biarmipes	S.Korea	West_US	-0.00347634	0.000236317	-14.7105
Brazil	S.Korea	D. biarmipes	West_US	-0.00236097	0.000356681	-6.61926
Brazil	West_US	D. biarmipes	S.Korea	0.00111537	0.000254188	4.38797
Brazil	D. subpulchrella	East_US	Hawaii	0.00358204	0.000644064	5.56163
Brazil	East_US	D. subpulchrella	Hawaii	0.000938712	0.000665219	1.41113
Brazil	Hawaii	D. subpulchrella	East_US	-0.00264333	0.00071058	-3.71996
Brazil	D. subpulchrella	East_US	Ireland	0.00588687	0.000396031	14.8647
Brazil	East_US	D. subpulchrella	Ireland	0.000138139	0.000234662	0.588674
Brazil	Ireland	D. subpulchrella	East_US	-0.00574874	0.000446089	-12.887
Brazil	D. subpulchrella	East_US	Italy	0.00873405	0.000440251	19.8388
Brazil	East_US	D. subpulchrella	Italy	-6.79608e-05	0.000147704	-0.460114
Brazil	Italy	D. subpulchrella	East_US	-0.00880201	0.000431986	-20.3757
Brazil	D. subpulchrella	East_US	Japan	0.00757066	0.000402497	18.8092
Brazil	East_US	D. subpulchrella	Japan	0.000423306	0.000195703	2.163
Brazil	Japan	D. subpulchrella	East_US	-0.00714735	0.000448265	-15.9445
Brazil	D. subpulchrella	East_US	S.Korea	0.0062611	0.000327716	19.1052
Brazil	East_US	D. subpulchrella	S.Korea	0.000533462	0.00018121	2.94389
Brazil	S.Korea	D. subpulchrella	East_US	-0.00572764	0.000394882	-14.5047
Brazil	D. subpulchrella	East_US	West_US	0.0026603	0.000297099	8.95426
Brazil	East_US	D. subpulchrella	West_US	0.000869148	0.000357729	2.42962
Brazil	West_US	D. subpulchrella	East_US	-0.00179116	0.000476746	-3.75705
Brazil	D. subpulchrella	Hawaii	Ireland	0.00230483	0.000626505	3.67888
Brazil	Hawaii	D. subpulchrella	Ireland	-0.00100005	0.000612708	-1.63218
Brazil	Ireland	D. subpulchrella	Hawaii	-0.00330488	0.000729759	-4.52873
Brazil	D. subpulchrella	Hawaii	Italy	0.00515201	0.00060039	8.5811
Brazil	Hawaii	D. subpulchrella	Italy	0.000948417	0.000383196	2.47502
Brazil	Italy	D. subpulchrella	Hawaii	-0.00420359	0.000630932	-6.66251
Brazil	D. subpulchrella	Hawaii	Japan	0.00398861	0.0006697	5.95582
Brazil	Hawaii	D. subpulchrella	Japan	0.00128445	0.000585897	2.19228
Brazil	Japan	D. subpulchrella	Hawaii	-0.00270416	0.000674225	-4.01077
Brazil	D. subpulchrella	Hawaii	S.Korea	0.00267906	0.000603013	4.44279
Brazil	Hawaii	D. subpulchrella	S.Korea	0.000555552	0.000516911	1.07475
Brazil	S.Korea	D. subpulchrella	Hawaii	-0.00212351	0.000570842	-3.71996
Brazil	D. subpulchrella	Hawaii	West_US	-0.000921736	0.00057423	-1.60517
Brazil	Hawaii	D. subpulchrella	West_US	0.00828462	0.00109576	7.56061
Brazil	West_US	D. subpulchrella	Hawaii	0.00920635	0.00109969	8.37178
Brazil	D. subpulchrella	Ireland	Italy	0.00284718	0.000389833	7.30357
Brazil	Ireland	D. subpulchrella	Italy	0.00426802	0.000466466	9.14971
Brazil	Italy	D. subpulchrella	Ireland	0.00142085	0.000578484	2.45616
Brazil	D. subpulchrella	Ireland	Japan	0.00168378	0.000380865	4.42094
Brazil	Ireland	D. subpulchrella	Japan	-0.000353713	0.000291878	-1.21185
Brazil	Japan	D. subpulchrella	Ireland	-0.00203749	0.000368206	-5.53358
Brazil	D. subpulchrella	Ireland	S.Korea	0.000374229	0.000361888	1.0341
Brazil	Ireland	D. subpulchrella	S.Korea	-6.94702e-05	0.000242422	-0.286567
Brazil	S.Korea	D. subpulchrella	Ireland	-0.000443699	0.000291196	-1.52371
Brazil	D. subpulchrella	Ireland	West_US	-0.00322657	0.000353591	-9.12515
Brazil	Ireland	D. subpulchrella	West_US	-0.00409784	0.000309597	-13.2361
Brazil	West_US	D. subpulchrella	Ireland	-0.000871272	0.000282129	-3.0882
Brazil	D. subpulchrella	Italy	Japan	-0.0011634	0.000391094	-2.97472
Brazil	Italy	D. subpulchrella	Japan	-0.00101733	0.000344708	-2.95128
Brazil	Japan	D. subpulchrella	Italy	0.000146066	0.000338763	0.431175
Brazil	D. subpulchrella	Italy	S.Korea	-0.00247295	0.000346854	-7.12965
Brazil	Italy	D. subpulchrella	S.Korea	-0.00177524	0.000335674	-5.28858
Brazil	S.Korea	D. subpulchrella	Italy	0.000697713	0.000184629	3.77901
Brazil	D. subpulchrella	Italy	West_US	-0.00607375	0.000388877	-15.6187
Brazil	Italy	D. subpulchrella	West_US	-0.00605429	0.000393586	-15.3824
Brazil	West_US	D. subpulchrella	Italy	1.94622e-05	0.00017002	0.11447
Brazil	D. subpulchrella	Japan	S.Korea	-0.00130955	0.000395666	-3.30974
Brazil	Japan	D. subpulchrella	S.Korea	-0.000300328	0.000424678	-0.70719
Brazil	S.Korea	D. subpulchrella	Japan	0.00100922	0.000266925	3.78093
Brazil	D. subpulchrella	Japan	West_US	-0.00491035	0.000373918	-13.1321
Brazil	Japan	D. subpulchrella	West_US	-0.0039961	0.000515579	-7.7507
Brazil	West_US	D. subpulchrella	Japan	0.000914254	0.000324404	2.81825
Brazil	D. subpulchrella	S.Korea	West_US	-0.0036008	0.000230406	-15.628
Brazil	S.Korea	D. subpulchrella	West_US	-0.00254383	0.000325853	-7.80668
Brazil	West_US	D. subpulchrella	S.Korea	0.00105697	0.000249032	4.24431
Brazil	East_US	Hawaii	Ireland	-0.000800573	0.000734289	-1.09027
Brazil	Hawaii	East_US	Ireland	0.00164328	0.000851738	1.92932
Brazil	Ireland	East_US	Hawaii	0.00244385	0.000733202	3.33312
Brazil	East_US	Hawaii	Italy	-0.00100667	0.000625841	-1.60851
Brazil	Hawaii	East_US	Italy	0.00359175	0.000679871	5.28298
Brazil	Italy	East_US	Hawaii	0.00459842	0.000599536	7.66997
Brazil	East_US	Hawaii	Japan	-0.000515406	0.000666699	-0.773072
Brazil	Hawaii	East_US	Japan	0.00392778	0.000716622	5.48097
Brazil	Japan	East_US	Hawaii	0.00444319	0.000561804	7.90879
Brazil	East_US	Hawaii	S.Korea	-0.00040525	0.000652429	-0.62114
Brazil	Hawaii	East_US	S.Korea	0.00319888	0.000755308	4.2352
Brazil	S.Korea	East_US	Hawaii	0.00360413	0.000595382	6.05348
Brazil	East_US	Hawaii	West_US	-6.95641e-05	0.000568505	-0.122363
Brazil	Hawaii	East_US	West_US	0.0109279	0.000824385	13.2559
Brazil	West_US	East_US	Hawaii	0.0109975	0.00109829	10.0133
Brazil	East_US	Ireland	Italy	-0.0002061	0.000243925	-0.844932
Brazil	Ireland	East_US	Italy	0.0100168	0.000647045	15.4808
Brazil	Italy	East_US	Ireland	0.0102229	0.000602984	16.9538
Brazil	East_US	Ireland	Japan	0.000285166	0.000285593	0.998505
Brazil	Ireland	East_US	Japan	0.00539502	0.000363582	14.8385
Brazil	Japan	East_US	Ireland	0.00510986	0.000391437	13.0541
Brazil	East_US	Ireland	S.Korea	0.000395323	0.000245549	1.60996
Brazil	Ireland	East_US	S.Korea	0.00567926	0.00037964	14.9596
Brazil	S.Korea	East_US	Ireland	0.00528394	0.000374893	14.0945
Brazil	East_US	Ireland	West_US	0.000731009	0.000398486	1.83446
Brazil	Ireland	East_US	West_US	0.00165089	0.000399597	4.13139
Brazil	West_US	East_US	Ireland	0.000919885	0.000463816	1.9833
Brazil	East_US	Italy	Japan	0.000491266	0.000186919	2.62824
Brazil	Italy	East_US	Japan	0.00778468	0.000374506	20.7866
Brazil	Japan	East_US	Italy	0.00729342	0.000401125	18.1824
Brazil	East_US	Italy	S.Korea	0.000601423	0.000140131	4.29186
Brazil	Italy	East_US	S.Korea	0.00702678	0.000344441	20.4005
Brazil	S.Korea	East_US	Italy	0.00642535	0.000410818	15.6404
Brazil	East_US	Italy	West_US	0.000937109	0.000334809	2.79894
Brazil	Italy	East_US	West_US	0.00274773	0.000294176	9.34042
Brazil	West_US	East_US	Italy	0.00181062	0.000478409	3.78467
Brazil	East_US	Japan	S.Korea	0.000110157	0.000174279	0.632071
Brazil	Japan	East_US	S.Korea	0.00684702	0.000364819	18.7683
Brazil	S.Korea	East_US	Japan	0.00673687	0.00043464	15.4999
Brazil	East_US	Japan	West_US	0.000445842	0.00034641	1.28704
Brazil	Japan	East_US	West_US	0.00315125	0.000371371	8.48545
Brazil	West_US	East_US	Japan	0.00270541	0.000526505	5.13843
Brazil	East_US	S.Korea	West_US	0.000335686	0.000264014	1.27147
Brazil	S.Korea	East_US	West_US	0.00318381	0.000349188	9.11776
Brazil	West_US	East_US	S.Korea	0.00284813	0.000470649	6.0515
Brazil	Hawaii	Ireland	Italy	0.00194847	0.000467225	4.1703
Brazil	Ireland	Hawaii	Italy	0.00757291	0.000828204	9.14377
Brazil	Italy	Hawaii	Ireland	0.00562444	0.00079588	7.06695
Brazil	Hawaii	Ireland	Japan	0.0022845	0.000611113	3.73827
Brazil	Ireland	Hawaii	Japan	0.00295117	0.000708618	4.16469
Brazil	Japan	Hawaii	Ireland	0.000666667	0.00066294	1.00562
Brazil	Hawaii	Ireland	S.Korea	0.0015556	0.000506072	3.07387
Brazil	Ireland	Hawaii	S.Korea	0.00323541	0.000703929	4.59622
Brazil	S.Korea	Hawaii	Ireland	0.00167981	0.000608281	2.76157
Brazil	Hawaii	Ireland	West_US	0.00928467	0.00122323	7.59026
Brazil	Ireland	Hawaii	West_US	-0.000792958	0.000613054	-1.29346
Brazil	West_US	Hawaii	Ireland	-0.0100776	0.00109538	-9.20013
Brazil	Hawaii	Italy	Japan	0.000336037	0.000475709	0.706392
Brazil	Italy	Hawaii	Japan	0.00318626	0.00067421	4.72592
Brazil	Japan	Hawaii	Italy	0.00285023	0.000686859	4.14965
Brazil	Hawaii	Italy	S.Korea	-0.000392865	0.000445578	-0.881698
Brazil	Italy	Hawaii	S.Korea	0.00242836	0.000631212	3.84713
Brazil	S.Korea	Hawaii	Italy	0.00282122	0.000565572	4.98826
Brazil	Hawaii	Italy	West_US	0.0073362	0.00110575	6.63457
Brazil	Italy	Hawaii	West_US	-0.00185069	0.000571026	-3.24099
Brazil	West_US	Hawaii	Italy	-0.00918689	0.00108083	-8.49984
Brazil	Hawaii	Japan	S.Korea	-0.000728902	0.000407088	-1.79053
Brazil	Japan	Hawaii	S.Korea	0.00240383	0.000586502	4.09859
Brazil	S.Korea	Hawaii	Japan	0.00313273	0.000569935	5.49665
Brazil	Hawaii	Japan	West_US	0.00700016	0.00109353	6.40142
Brazil	Japan	Hawaii	West_US	-0.00129194	0.000536694	-2.40721
Brazil	West_US	Hawaii	Japan	-0.0082921	0.00113469	-7.30781
Brazil	Hawaii	S.Korea	West_US	0.00772907	0.0010599	7.29226
Brazil	S.Korea	Hawaii	West_US	-0.000420317	0.000488234	-0.860892
Brazil	West_US	Hawaii	S.Korea	-0.00814938	0.00108352	-7.5212
Brazil	Ireland	Italy	Japan	-0.00462174	0.000536424	-8.61583
Brazil	Italy	Ireland	Japan	-0.00243818	0.000600002	-4.06362
Brazil	Japan	Ireland	Italy	0.00218356	0.000275236	7.93342
Brazil	Ireland	Italy	S.Korea	-0.00433749	0.000453082	-9.5733
Brazil	Italy	Ireland	S.Korea	-0.00319608	0.000474527	-6.7353
Brazil	S.Korea	Ireland	Italy	0.00114141	0.000255328	4.47038
Brazil	Ireland	Italy	West_US	-0.00836587	0.000530283	-15.7762
Brazil	Italy	Ireland	West_US	-0.00747513	0.000532405	-14.0403
Brazil	West_US	Ireland	Italy	0.000890734	0.000240069	3.71032
Brazil	Ireland	Japan	S.Korea	0.000284243	0.000242224	1.17347
Brazil	Japan	Ireland	S.Korea	0.00173717	0.000407304	4.26503
Brazil	S.Korea	Ireland	Japan	0.00145292	0.000369671	3.93031
Brazil	Ireland	Japan	West_US	-0.00374413	0.000321694	-11.6388
Brazil	Japan	Ireland	West_US	-0.0019586	0.000525252	-3.72889
Brazil	West_US	Ireland	Japan	0.00178553	0.000453845	3.93421
Brazil	Ireland	S.Korea	West_US	-0.00402837	0.000261603	-15.3988
Brazil	S.Korea	Ireland	West_US	-0.00210013	0.000374859	-5.60244
Brazil	West_US	Ireland	S.Korea	0.00192824	0.000334176	5.77014
Brazil	Italy	Japan	S.Korea	-0.000757905	0.000307953	-2.46111
Brazil	Japan	Italy	S.Korea	-0.000446394	0.000384841	-1.15994
Brazil	S.Korea	Italy	Japan	0.000311511	0.000279193	1.11575
Brazil	Italy	Japan	West_US	-0.00503695	0.000344578	-14.6178
Brazil	Japan	Italy	West_US	-0.00414216	0.000511383	-8.09992
Brazil	West_US	Italy	Japan	0.000894791	0.000350459	2.5532
Brazil	Italy	S.Korea	West_US	-0.00427905	0.000234997	-18.2089
Brazil	S.Korea	Italy	West_US	-0.00324154	0.00030609	-10.5902
Brazil	West_US	Italy	S.Korea	0.00103751	0.000226884	4.57287
Brazil	Japan	S.Korea	West_US	-0.00369577	0.000271361	-13.6194
Brazil	S.Korea	Japan	West_US	-0.00355305	0.000272227	-13.0518
Brazil	West_US	Japan	S.Korea	0.000142718	0.00019581	0.728857
D. biarmipes	D. subpulchrella	East_US	Hawaii	0.0004562	0.000394489	1.15643
D. biarmipes	East_US	D. subpulchrella	Hawaii	0.0156522	0.000920873	16.9971
D. biarmipes	Hawaii	D. subpulchrella	East_US	0.015196	0.000924458	16.4377
D. biarmipes	D. subpulchrella	East_US	Ireland	7.70607e-05	0.000195203	0.394772
D. biarmipes	East_US	D. subpulchrella	Ireland	0.0121676	0.000934147	13.0254
D. biarmipes	Ireland	D. subpulchrella	East_US	0.0120906	0.000917179	13.1823
D. biarmipes	D. subpulchrella	East_US	Italy	0.000452483	0.000229251	1.97374
D. biarmipes	East_US	D. subpulchrella	Italy	0.00948976	0.000849774	11.1674
D. biarmipes	Italy	D. subpulchrella	East_US	0.00903727	0.000829243	10.8982
D. biarmipes	D. subpulchrella	East_US	Japan	-3.54252e-05	0.000265193	-0.133583
D. biarmipes	East_US	D. subpulchrella	Japan	0.0106565	0.000966845	11.0219
D. biarmipes	Japan	D. subpulchrella	East_US	0.0106919	0.000974298	10.974
D. biarmipes	D. subpulchrella	East_US	S.Korea	0.000231351	0.000162233	1.42604
D. biarmipes	East_US	D. subpulchrella	S.Korea	0.012343	0.000744612	16.5764
D. biarmipes	S.Korea	D. subpulchrella	East_US	0.0121116	0.00075544	16.0326
D. biarmipes	D. subpulchrella	East_US	West_US	0.000106888	0.000157113	0.680327
D. biarmipes	East_US	D. subpulchrella	West_US	0.016155	0.000730309	22.1208
D. biarmipes	West_US	D. subpulchrella	East_US	0.0160481	0.000731213	21.9473
D. biarmipes	D. subpulchrella	Hawaii	Ireland	-0.000379139	0.000356969	-1.06211
D. biarmipes	Hawaii	D. subpulchrella	Ireland	0.0110294	0.00107631	10.2474
D. biarmipes	Ireland	D. subpulchrella	Hawaii	0.0114086	0.00101613	11.2275
D. biarmipes	D. subpulchrella	Hawaii	Italy	-3.71685e-06	0.000388562	-0.00956566
D. biarmipes	Hawaii	D. subpulchrella	Italy	0.0105061	0.000958765	10.958
D. biarmipes	Italy	D. subpulchrella	Hawaii	0.0105099	0.000925062	11.3612
D. biarmipes	D. subpulchrella	Hawaii	Japan	-0.000491625	0.000373929	-1.31476
D. biarmipes	Hawaii	D. subpulchrella	Japan	0.0115177	0.00111581	10.3222
D. biarmipes	Japan	D. subpulchrella	Hawaii	0.0120093	0.00110541	10.8641
D. biarmipes	D. subpulchrella	Hawaii	S.Korea	-0.000224849	0.000368874	-0.609556
D. biarmipes	Hawaii	D. subpulchrella	S.Korea	0.0123651	0.00102343	12.082
D. biarmipes	S.Korea	D. subpulchrella	Hawaii	0.0125899	0.000957297	13.1515
D. biarmipes	D. subpulchrella	Hawaii	West_US	-0.000349312	0.000354295	-0.985933
D. biarmipes	Hawaii	D. subpulchrella	West_US	0.0235705	0.00146741	16.0626
D. biarmipes	West_US	D. subpulchrella	Hawaii	0.0239198	0.00147621	16.2035
D. biarmipes	D. subpulchrella	Ireland	Italy	0.000375423	0.000194324	1.93194
D. biarmipes	Ireland	D. subpulchrella	Italy	0.0138257	0.00113807	12.1484
D. biarmipes	Italy	D. subpulchrella	Ireland	0.0134503	0.00112568	11.9486
D. biarmipes	D. subpulchrella	Ireland	Japan	-0.000112486	0.000290381	-0.387373
D. biarmipes	Ireland	D. subpulchrella	Japan	0.00987949	0.000945318	10.451
D. biarmipes	Japan	D. subpulchrella	Ireland	0.00999198	0.000985877	10.1351
D. biarmipes	D. subpulchrella	Ireland	S.Korea	0.00015429	0.000187645	0.822246
D. biarmipes	Ireland	D. subpulchrella	S.Korea	0.0117401	0.000812898	14.4422
D. biarmipes	S.Korea	D. subpulchrella	Ireland	0.0115858	0.000846846	13.6811
D. biarmipes	D. subpulchrella	Ireland	West_US	2.98278e-05	0.000180033	0.165679
D. biarmipes	Ireland	D. subpulchrella	West_US	0.011188	0.000841808	13.2905
D. biarmipes	West_US	D. subpulchrella	Ireland	0.0111582	0.000857857	13.0071
D. biarmipes	D. subpulchrella	Italy	Japan	-0.000487908	0.000333956	-1.461
D. biarmipes	Italy	D. subpulchrella	Japan	0.00921587	0.000928005	9.93085
D. biarmipes	Japan	D. subpulchrella	Italy	0.00970378	0.000938151	10.3435
D. biarmipes	D. subpulchrella	Italy	S.Korea	-0.000221132	0.000200377	-1.10358
D. biarmipes	Italy	D. subpulchrella	S.Korea	0.0100343	0.000877693	11.4326
D. biarmipes	S.Korea	D. subpulchrella	Italy	0.0102554	0.000889704	11.5268
D. biarmipes	D. subpulchrella	Italy	West_US	-0.000345595	0.000222832	-1.55092
D. biarmipes	Italy	D. subpulchrella	West_US	0.00923158	0.000843233	10.9478
D. biarmipes	West_US	D. subpulchrella	Italy	0.00957718	0.000847442	11.3013
D. biarmipes	D. subpulchrella	Japan	S.Korea	0.000266776	0.000271104	0.984036
D. biarmipes	Japan	D. subpulchrella	S.Korea	0.0115092	0.00101023	11.3926
D. biarmipes	S.Korea	D. subpulchrella	Japan	0.0112424	0.000995988	11.2877
D. biarmipes	D. subpulchrella	Japan	West_US	0.000142314	0.000266956	0.533098
D. biarmipes	Japan	D. subpulchrella	West_US	0.0112898	0.00105601	10.691
D. biarmipes	West_US	D. subpulchrella	Japan	0.0111475	0.00103357	10.7854
D. biarmipes	D. subpulchrella	S.Korea	West_US	-0.000124462	0.000122825	-1.01333
D. biarmipes	S.Korea	D. subpulchrella	West_US	0.012742	0.000821038	15.5194
D. biarmipes	West_US	D. subpulchrella	S.Korea	0.0128665	0.000814747	15.792
D. biarmipes	East_US	Hawaii	Ireland	-0.00348455	0.000708074	-4.92116
D. biarmipes	Hawaii	East_US	Ireland	-0.00416654	0.000871355	-4.78168
D. biarmipes	Ireland	East_US	Hawaii	-0.00068199	0.0005739	-1.18834
D. biarmipes	East_US	Hawaii	Italy	-0.0061624	0.000745871	-8.26202
D. biarmipes	Hawaii	East_US	Italy	-0.00468982	0.000778382	-6.02509
D. biarmipes	Italy	East_US	Hawaii	0.00147258	0.000378198	3.89366
D. biarmipes	East_US	Hawaii	Japan	-0.00499565	0.000767591	-6.50821
D. biarmipes	Hawaii	East_US	Japan	-0.0036783	0.00086524	-4.25119
D. biarmipes	Japan	East_US	Hawaii	0.00131735	0.000508246	2.59195
D. biarmipes	East_US	Hawaii	S.Korea	-0.00330916	0.000624937	-5.29519
D. biarmipes	Hawaii	East_US	S.Korea	-0.00283087	0.000695444	-4.0706
D. biarmipes	S.Korea	East_US	Hawaii	0.00047829	0.000470369	1.01684
D. biarmipes	East_US	Hawaii	West_US	0.000502861	0.000539786	0.931592
D. biarmipes	Hawaii	East_US	West_US	0.00837453	0.000778742	10.7539
D. biarmipes	West_US	East_US	Hawaii	0.00787167	0.00115436	6.81905
D. biarmipes	East_US	Ireland	Italy	-0.00267786	0.000382751	-6.99635
D. biarmipes	Ireland	East_US	Italy	0.00173519	0.000636734	2.72514
D. biarmipes	Italy	East_US	Ireland	0.00441305	0.000497656	8.86766
D. biarmipes	East_US	Ireland	Japan	-0.0015111	0.000427521	-3.53456
D. biarmipes	Ireland	East_US	Japan	-0.00221106	0.00035193	-6.28266
D. biarmipes	Japan	East_US	Ireland	-0.000699958	0.000328108	-2.13331
D. biarmipes	East_US	Ireland	S.Korea	0.000175384	0.000372631	0.470664
D. biarmipes	Ireland	East_US	S.Korea	-0.000350488	0.000313149	-1.11924
D. biarmipes	S.Korea	East_US	Ireland	-0.000525872	0.000292571	-1.79741
D. biarmipes	East_US	Ireland	West_US	0.00398741	0.000474622	8.40123
D. biarmipes	Ireland	East_US	West_US	-0.000902523	0.000290903	-3.10248
D. biarmipes	West_US	East_US	Ireland	-0.00488993	0.000386026	-12.6674
D. biarmipes	East_US	Italy	Japan	0.00116675	0.000426122	2.73808
D. biarmipes	Italy	East_US	Japan	0.000178601	0.000353677	0.504985
D. biarmipes	Japan	East_US	Italy	-0.000988153	0.00035662	-2.77089
D. biarmipes	East_US	Italy	S.Korea	0.00285324	0.000311522	9.15902
D. biarmipes	Italy	East_US	S.Korea	0.000997025	0.000230565	4.32426
D. biarmipes	S.Korea	East_US	Italy	-0.00185621	0.00039617	-4.6854
D. biarmipes	East_US	Italy	West_US	0.00666526	0.000474149	14.0573
D. biarmipes	Italy	East_US	West_US	0.000194311	0.000167575	1.15955
D. biarmipes	West_US	East_US	Italy	-0.00647095	0.000492754	-13.1322
D. biarmipes	East_US	Japan	S.Korea	0.00168649	0.000412136	4.09205
D. biarmipes	Japan	East_US	S.Korea	0.000817269	0.000259057	3.15479
D. biarmipes	S.Korea	East_US	Japan	-0.000869216	0.000468377	-1.8558
D. biarmipes	East_US	Japan	West_US	0.00549851	0.000507225	10.8404
D. biarmipes	Japan	East_US	West_US	0.000597836	0.00027966	2.13773
D. biarmipes	West_US	East_US	Japan	-0.00490067	0.000606735	-8.07712
D. biarmipes	East_US	S.Korea	West_US	0.00381202	0.000266712	14.2927
D. biarmipes	S.Korea	East_US	West_US	0.000630397	0.000231864	2.71882
D. biarmipes	West_US	East_US	S.Korea	-0.00318162	0.000346446	-9.18362
D. biarmipes	Hawaii	Ireland	Italy	-0.000523288	0.000468884	-1.11603
D. biarmipes	Ireland	Hawaii	Italy	0.00241718	0.000726686	3.32631
D. biarmipes	Italy	Hawaii	Ireland	0.00294047	0.000578099	5.08644
D. biarmipes	Hawaii	Ireland	Japan	0.000488237	0.000723738	0.674605
D. biarmipes	Ireland	Hawaii	Japan	-0.00152907	0.000590427	-2.58977
D. biarmipes	Japan	Hawaii	Ireland	-0.00201731	0.000551901	-3.6552
D. biarmipes	Hawaii	Ireland	S.Korea	0.00133566	0.000553017	2.41523
D. biarmipes	Ireland	Hawaii	S.Korea	0.000331502	0.000551601	0.600982
D. biarmipes	S.Korea	Hawaii	Ireland	-0.00100416	0.00048214	-2.08272
D. biarmipes	Hawaii	Ireland	West_US	0.0125411	0.00133576	9.38873
D. biarmipes	Ireland	Hawaii	West_US	-0.000220533	0.00047941	-0.460009
D. biarmipes	West_US	Hawaii	Ireland	-0.0127616	0.00121622	-10.4928
D. biarmipes	Hawaii	Italy	Japan	0.00101152	0.000524173	1.92975
D. biarmipes	Italy	Hawaii	Japan	-0.00129398	0.000411552	-3.14413
D. biarmipes	Japan	Hawaii	Italy	-0.0023055	0.00050282	-4.58514
D. biarmipes	Hawaii	Italy	S.Korea	0.00185895	0.000468622	3.96685
D. biarmipes	Italy	Hawaii	S.Korea	-0.000475553	0.000345771	-1.37534
D. biarmipes	S.Korea	Hawaii	Italy	-0.0023345	0.00041807	-5.584
D. biarmipes	Hawaii	Italy	West_US	0.0130644	0.00131609	9.92662
D. biarmipes	Italy	Hawaii	West_US	-0.00127827	0.000327268	-3.90586
D. biarmipes	West_US	Hawaii	Italy	-0.0143426	0.0013111	-10.9394
D. biarmipes	Hawaii	Japan	S.Korea	0.000847427	0.000543063	1.56046
D. biarmipes	Japan	Hawaii	S.Korea	-0.000500079	0.000369632	-1.35291
D. biarmipes	S.Korea	Hawaii	Japan	-0.00134751	0.000446682	-3.0167
D. biarmipes	Hawaii	Japan	West_US	0.0120528	0.00132114	9.12306
D. biarmipes	Japan	Hawaii	West_US	-0.000719512	0.000460304	-1.56312
D. biarmipes	West_US	Hawaii	Japan	-0.0127723	0.00135923	-9.39677
D. biarmipes	Hawaii	S.Korea	West_US	0.0112054	0.00112481	9.96205
D. biarmipes	S.Korea	Hawaii	West_US	0.000152108	0.000386798	0.393248
D. biarmipes	West_US	Hawaii	S.Korea	-0.0110533	0.00116326	-9.502
D. biarmipes	Ireland	Italy	Japan	-0.00394625	0.000651261	-6.05939
D. biarmipes	Italy	Ireland	Japan	-0.00423444	0.000603467	-7.01686
D. biarmipes	Japan	Ireland	Italy	-0.000288195	0.000329106	-0.875692
D. biarmipes	Ireland	Italy	S.Korea	-0.00208568	0.00058847	-3.54424
D. biarmipes	Italy	Ireland	S.Korea	-0.00341602	0.000411583	-8.29972
D. biarmipes	S.Korea	Ireland	Italy	-0.00133034	0.000376152	-3.53672
D. biarmipes	Ireland	Italy	West_US	-0.00263771	0.000663528	-3.97529
D. biarmipes	Italy	Ireland	West_US	-0.00421873	0.000505971	-8.3379
D. biarmipes	West_US	Ireland	Italy	-0.00158102	0.000367578	-4.30118
D. biarmipes	Ireland	Japan	S.Korea	0.00186057	0.000413502	4.49955
D. biarmipes	Japan	Ireland	S.Korea	0.00151723	0.000358191	4.2358
D. biarmipes	S.Korea	Ireland	Japan	-0.000343344	0.000472163	-0.727172
D. biarmipes	Ireland	Japan	West_US	0.00130854	0.000411562	3.17944
D. biarmipes	Japan	Ireland	West_US	0.00129779	0.00044269	2.93161
D. biarmipes	West_US	Ireland	Japan	-1.07418e-05	0.000531695	-0.0202029
D. biarmipes	Ireland	S.Korea	West_US	-0.000552035	0.000228687	-2.41394
D. biarmipes	S.Korea	Ireland	West_US	0.00115627	0.000337502	3.42596
D. biarmipes	West_US	Ireland	S.Korea	0.0017083	0.000326201	5.23697
D. biarmipes	Italy	Japan	S.Korea	0.000818423	0.000349389	2.34244
D. biarmipes	Japan	Italy	S.Korea	0.00180542	0.000321442	5.61663
D. biarmipes	S.Korea	Italy	Japan	0.000986999	0.000386041	2.55672
D. biarmipes	Italy	Japan	West_US	1.57101e-05	0.000335302	0.0468534
D. biarmipes	Japan	Italy	West_US	0.00158599	0.000447666	3.54279
D. biarmipes	West_US	Italy	Japan	0.00157028	0.000486684	3.22649
D. biarmipes	Italy	S.Korea	West_US	-0.000802713	0.000182634	-4.3952
D. biarmipes	S.Korea	Italy	West_US	0.00248661	0.000415711	5.98158
D. biarmipes	West_US	Italy	S.Korea	0.00328933	0.000376231	8.74283
D. biarmipes	Japan	S.Korea	West_US	-0.000219433	0.000217608	-1.00839
D. biarmipes	S.Korea	Japan	West_US	0.00149961	0.000398132	3.76662
D. biarmipes	West_US	Japan	S.Korea	0.00171905	0.00043076	3.99073
D. subpulchrella	East_US	Hawaii	Ireland	-0.00310541	0.000686397	-4.52421
D. subpulchrella	Hawaii	East_US	Ireland	-0.0042436	0.000879054	-4.82746
D. subpulchrella	Ireland	East_US	Hawaii	-0.00113819	0.000631938	-1.80111
D. subpulchrella	East_US	Hawaii	Italy	-0.00615868	0.000718066	-8.57676
D. subpulchrella	Hawaii	East_US	Italy	-0.00514231	0.000742345	-6.92711
D. subpulchrella	Italy	East_US	Hawaii	0.00101638	0.000395151	2.57213
D. subpulchrella	East_US	Hawaii	Japan	-0.00450402	0.000763037	-5.90276
D. subpulchrella	Hawaii	East_US	Japan	-0.00364287	0.000812438	-4.48388
D. subpulchrella	Japan	East_US	Hawaii	0.000861148	0.000524917	1.64054
D. subpulchrella	East_US	Hawaii	S.Korea	-0.00308431	0.000598919	-5.1498
D. subpulchrella	Hawaii	East_US	S.Korea	-0.00306222	0.000673801	-4.5447
D. subpulchrella	S.Korea	East_US	Hawaii	2.20895e-05	0.000517241	0.0427064
D. subpulchrella	East_US	Hawaii	West_US	0.000852172	0.000512878	1.66155
D. subpulchrella	Hawaii	East_US	West_US	0.00826764	0.000786436	10.5128
D. subpulchrella	West_US	East_US	Hawaii	0.00741547	0.00111627	6.64309
D. subpulchrella	East_US	Ireland	Italy	-0.00305328	0.000353056	-8.64814
D. subpulchrella	Ireland	East_US	Italy	0.00128271	0.000560608	2.28807
D. subpulchrella	Italy	East_US	Ireland	0.00433599	0.000461087	9.40384
D. subpulchrella	East_US	Ireland	Japan	-0.00139862	0.000399537	-3.50059
D. subpulchrella	Ireland	East_US	Japan	-0.00217563	0.000318617	-6.82838
D. subpulchrella	Japan	East_US	Ireland	-0.000777019	0.000311868	-2.4915
D. subpulchrella	East_US	Ireland	S.Korea	2.10937e-05	0.00039194	0.0538187
D. subpulchrella	Ireland	East_US	S.Korea	-0.000581839	0.000322675	-1.80317
D. subpulchrella	S.Korea	East_US	Ireland	-0.000602932	0.000255904	-2.35609
D. subpulchrella	East_US	Ireland	West_US	0.00395758	0.000482448	8.20311
D. subpulchrella	Ireland	East_US	West_US	-0.00100941	0.000320108	-3.15335
D. subpulchrella	West_US	East_US	Ireland	-0.00496699	0.000371021	-13.3874
D. subpulchrella	East_US	Italy	Japan	0.00165466	0.000405028	4.0853
D. subpulchrella	Italy	East_US	Japan	0.000214027	0.000331704	0.645234
D. subpulchrella	Japan	East_US	Italy	-0.00144064	0.000343828	-4.18999
D. subpulchrella	East_US	Italy	S.Korea	0.00307437	0.000324905	9.46238
D. subpulchrella	Italy	East_US	S.Korea	0.000765674	0.000191187	4.00485
D. subpulchrella	S.Korea	East_US	Italy	-0.0023087	0.000347136	-6.65071
D. subpulchrella	East_US	Italy	West_US	0.00701086	0.000447543	15.6652
D. subpulchrella	Italy	East_US	West_US	8.74231e-05	0.000139377	0.627242
D. subpulchrella	West_US	East_US	Italy	-0.00692343	0.000457344	-15.1384
D. subpulchrella	East_US	Japan	S.Korea	0.00141971	0.000421042	3.37189
D. subpulchrella	Japan	East_US	S.Korea	0.000585919	0.000205454	2.85182
D. subpulchrella	S.Korea	East_US	Japan	-0.00083379	0.000418668	-1.99153
D. subpulchrella	East_US	Japan	West_US	0.00535619	0.000498936	10.7352
D. subpulchrella	Japan	East_US	West_US	0.000490948	0.000220363	2.2279
D. subpulchrella	West_US	East_US	Japan	-0.00486525	0.000563068	-8.6406
D. subpulchrella	East_US	S.Korea	West_US	0.00393648	0.000248252	15.8568
D. subpulchrella	S.Korea	East_US	West_US	0.000523509	0.000218461	2.39635
D. subpulchrella	West_US	East_US	S.Korea	-0.00341298	0.000317079	-10.7638
D. subpulchrella	Hawaii	Ireland	Italy	-0.00089871	0.000465893	-1.92901
D. subpulchrella	Ireland	Hawaii	Italy	0.0024209	0.000725145	3.3385
D. subpulchrella	Italy	Hawaii	Ireland	0.00331961	0.000536757	6.18456
D. subpulchrella	Hawaii	Ireland	Japan	0.000600723	0.000672693	0.893012
D. subpulchrella	Ireland	Hawaii	Japan	-0.00103744	0.000655099	-1.58364
D. subpulchrella	Japan	Hawaii	Ireland	-0.00163817	0.000536713	-3.05222
D. subpulchrella	Hawaii	Ireland	S.Korea	0.00118137	0.000549251	2.15088
D. subpulchrella	Ireland	Hawaii	S.Korea	0.000556351	0.000627525	0.88658
D. subpulchrella	S.Korea	Hawaii	Ireland	-0.000625022	0.000515497	-1.21246
D. subpulchrella	Hawaii	Ireland	West_US	0.0125112	0.00133219	9.3915
D. subpulchrella	Ireland	Hawaii	West_US	0.000128779	0.000541816	0.23768
D. subpulchrella	West_US	Hawaii	Ireland	-0.0123825	0.0011858	-10.4423
D. subpulchrella	Hawaii	Italy	Japan	0.00149943	0.000473054	3.16969
D. subpulchrella	Italy	Hawaii	Japan	-0.000802351	0.000462667	-1.73419
D. subpulchrella	Japan	Hawaii	Italy	-0.00230178	0.000555457	-4.14395
D. subpulchrella	Hawaii	Italy	S.Korea	0.00208008	0.000458795	4.5338
D. subpulchrella	Italy	Hawaii	S.Korea	-0.000250704	0.000352367	-0.711485
D. subpulchrella	S.Korea	Hawaii	Italy	-0.00233079	0.000481153	-4.84417
D. subpulchrella	Hawaii	Italy	West_US	0.0134099	0.0012811	10.4675
D. subpulchrella	Italy	Hawaii	West_US	-0.000928955	0.000346979	-2.67726
D. subpulchrella	West_US	Hawaii	Italy	-0.0143389	0.00126154	-11.3662
D. subpulchrella	Hawaii	Japan	S.Korea	0.000580651	0.000525819	1.10428
D. subpulchrella	Japan	Hawaii	S.Korea	-0.000275229	0.000445953	-0.617171
D. subpulchrella	S.Korea	Hawaii	Japan	-0.00085588	0.000546418	-1.56635
D. subpulchrella	Hawaii	Japan	West_US	0.0119105	0.00130917	9.09776
D. subpulchrella	Japan	Hawaii	West_US	-0.0003702	0.000465789	-0.794781
D. subpulchrella	West_US	Hawaii	Japan	-0.0122807	0.00134025	-9.16299
D. subpulchrella	Hawaii	S.Korea	West_US	0.0113299	0.00111078	10.1999
D. subpulchrella	S.Korea	Hawaii	West_US	0.00050142	0.000435282	1.15194
D. subpulchrella	West_US	Hawaii	S.Korea	-0.0108284	0.00112709	-9.60745
D. subpulchrella	Ireland	Italy	Japan	-0.00345834	0.000629372	-5.49491
D. subpulchrella	Italy	Ireland	Japan	-0.00412196	0.000602893	-6.83697
D. subpulchrella	Japan	Ireland	Italy	-0.000663617	0.000328006	-2.02319
D. subpulchrella	Ireland	Italy	S.Korea	-0.00186455	0.00056362	-3.30816
D. subpulchrella	Italy	Ireland	S.Korea	-0.00357031	0.00039366	-9.06953
D. subpulchrella	S.Korea	Ireland	Italy	-0.00170577	0.00034817	-4.89923
D. subpulchrella	Ireland	Italy	West_US	-0.00229212	0.000590239	-3.88337
D. subpulchrella	Italy	Ireland	West_US	-0.00424856	0.000448018	-9.48301
D. subpulchrella	West_US	Ireland	Italy	-0.00195644	0.000341666	-5.72618
D. subpulchrella	Ireland	Japan	S.Korea	0.0015938	0.000419861	3.796
D. subpulchrella	Japan	Ireland	S.Korea	0.00136294	0.000328581	4.14795
D. subpulchrella	S.Korea	Ireland	Japan	-0.000230858	0.000420407	-0.549129
D. subpulchrella	Ireland	Japan	West_US	0.00116622	0.000409933	2.84491
D. subpulchrella	Japan	Ireland	West_US	0.00126797	0.0004141	3.06198
D. subpulchrella	West_US	Ireland	Japan	0.000101744	0.000504561	0.201649
D. subpulchrella	Ireland	S.Korea	West_US	-0.000427573	0.000228792	-1.86883
D. subpulchrella	S.Korea	Ireland	West_US	0.00112644	0.000299794	3.75739
D. subpulchrella	West_US	Ireland	S.Korea	0.00155401	0.000306464	5.07078
D. subpulchrella	Italy	Japan	S.Korea	0.000551647	0.000347122	1.5892
D. subpulchrella	Japan	Italy	S.Korea	0.00202655	0.000349634	5.79621
D. subpulchrella	S.Korea	Italy	Japan	0.00147491	0.000376965	3.91259
D. subpulchrella	Italy	Japan	West_US	-0.000126604	0.000344181	-0.367839
D. subpulchrella	Japan	Italy	West_US	0.00193158	0.000468489	4.12301
D. subpulchrella	West_US	Italy	Japan	0.00205819	0.000495414	4.15448
D. subpulchrella	Italy	S.Korea	West_US	-0.000678251	0.000189407	-3.58092
D. subpulchrella	S.Korea	Italy	West_US	0.00283221	0.000402514	7.03629
D. subpulchrella	West_US	Italy	S.Korea	0.00351046	0.000398312	8.81334
D. subpulchrella	Japan	S.Korea	West_US	-9.49707e-05	0.000210724	-0.450687
D. subpulchrella	S.Korea	Japan	West_US	0.0013573	0.00039779	3.4121
D. subpulchrella	West_US	Japan	S.Korea	0.00145227	0.000453682	3.20108
East_US	Hawaii	Ireland	Italy	0.00215457	0.00049895	4.3182
East_US	Ireland	Hawaii	Italy	0.00857958	0.000876753	9.78563
East_US	Italy	Hawaii	Ireland	0.00642501	0.000765426	8.39403
East_US	Hawaii	Ireland	Japan	0.00199934	0.000636363	3.14182
East_US	Ireland	Hawaii	Japan	0.00346658	0.000832332	4.1649
East_US	Japan	Hawaii	Ireland	0.00146724	0.000754207	1.94541
East_US	Hawaii	Ireland	S.Korea	0.00116028	0.000560099	2.07156
East_US	Ireland	Hawaii	S.Korea	0.00364066	0.000874135	4.16487
East_US	S.Korea	Hawaii	Ireland	0.00248038	0.000791523	3.13369
East_US	Hawaii	Ireland	West_US	0.00855366	0.00123145	6.94601
East_US	Ireland	Hawaii	West_US	-0.000723393	0.000671664	-1.07702
East_US	West_US	Hawaii	Ireland	-0.00927705	0.000793245	-11.6951
East_US	Hawaii	Italy	Japan	-0.00015523	0.000384501	-0.403717
East_US	Italy	Hawaii	Japan	0.00370167	0.000715095	5.17647
East_US	Japan	Hawaii	Italy	0.0038569	0.000777228	4.96238
East_US	Hawaii	Italy	S.Korea	-0.000994288	0.000424038	-2.34481
East_US	Italy	Hawaii	S.Korea	0.00283361	0.00058047	4.88158
East_US	S.Korea	Hawaii	Italy	0.0038279	0.00062381	6.13632
East_US	Hawaii	Italy	West_US	0.00639909	0.00111666	5.73057
East_US	Italy	Hawaii	West_US	-0.00178113	0.000486667	-3.65985
East_US	West_US	Hawaii	Italy	-0.00818022	0.000761985	-10.7354
East_US	Hawaii	Japan	S.Korea	-0.000839058	0.00040317	-2.08115
East_US	Japan	Hawaii	S.Korea	0.00280908	0.00060918	4.61125
East_US	S.Korea	Hawaii	Japan	0.00364814	0.000614354	5.93818
East_US	Hawaii	Japan	West_US	0.00655432	0.0011186	5.85938
East_US	Japan	Hawaii	West_US	-0.00122237	0.000531919	-2.29804
East_US	West_US	Hawaii	Japan	-0.00777669	0.000831161	-9.35642
East_US	Hawaii	S.Korea	West_US	0.00739338	0.00100292	7.37184
East_US	S.Korea	Hawaii	West_US	-0.000350753	0.000504551	-0.695177
East_US	West_US	Hawaii	S.Korea	-0.00774413	0.000706672	-10.9586
East_US	Ireland	Italy	Japan	-0.005113	0.000552728	-9.25049
East_US	Italy	Ireland	Japan	-0.00272334	0.000633946	-4.29586
East_US	Japan	Ireland	Italy	0.00238966	0.000241725	9.88585
East_US	Ireland	Italy	S.Korea	-0.00493892	0.000449966	-10.9762
East_US	Italy	Ireland	S.Korea	-0.00359141	0.000500352	-7.17776
East_US	S.Korea	Ireland	Italy	0.00134751	0.00032409	4.15784
East_US	Ireland	Italy	West_US	-0.00930298	0.000445739	-20.8709
East_US	Italy	Ireland	West_US	-0.00820614	0.000522343	-15.7102
East_US	West_US	Ireland	Italy	0.00109683	0.000307147	3.57104
East_US	Ireland	Japan	S.Korea	0.000174086	0.000277562	0.627197
East_US	Japan	Ireland	S.Korea	0.00134184	0.000398564	3.3667
East_US	S.Korea	Ireland	Japan	0.00116776	0.000364718	3.20181
East_US	Ireland	Japan	West_US	-0.00418997	0.000396816	-10.559
East_US	Japan	Ireland	West_US	-0.00268961	0.000549342	-4.89606
East_US	West_US	Ireland	Japan	0.00150036	0.000420705	3.5663
East_US	Ireland	S.Korea	West_US	-0.00436406	0.000299945	-14.5495
East_US	S.Korea	Ireland	West_US	-0.00283114	0.000446605	-6.33925
East_US	West_US	Ireland	S.Korea	0.00153292	0.000344604	4.44835
East_US	Italy	Japan	S.Korea	-0.000868062	0.000315687	-2.74975
East_US	Japan	Italy	S.Korea	-0.00104782	0.000353925	-2.96056
East_US	S.Korea	Italy	Japan	-0.000179755	0.000190364	-0.944272
East_US	Italy	Japan	West_US	-0.0054828	0.000435253	-12.5968
East_US	Japan	Italy	West_US	-0.00507927	0.000529831	-9.5866
East_US	West_US	Italy	Japan	0.000403525	0.000247269	1.63193
East_US	Italy	S.Korea	West_US	-0.00461474	0.000215071	-21.4568
East_US	S.Korea	Italy	West_US	-0.00417865	0.000262479	-15.9199
East_US	West_US	Italy	S.Korea	0.000436086	0.000194612	2.2408
East_US	Japan	S.Korea	West_US	-0.00403146	0.000260127	-15.4981
East_US	S.Korea	Japan	West_US	-0.00399889	0.000286284	-13.9683
East_US	West_US	Japan	S.Korea	3.25611e-05	0.000202372	0.160897
Hawaii	Ireland	Italy	Japan	-0.00495777	0.000724646	-6.84165
Hawaii	Italy	Ireland	Japan	-0.00472268	0.000823668	-5.73372
Hawaii	Japan	Ireland	Italy	0.000235093	0.000407577	0.576805
Hawaii	Ireland	Italy	S.Korea	-0.00394463	0.00074078	-5.32497
Hawaii	Italy	Ireland	S.Korea	-0.00475169	0.000715369	-6.64229
Hawaii	S.Korea	Ireland	Italy	-0.000807055	0.00048815	-1.65329
Hawaii	Ireland	Italy	West_US	-0.0157021	0.0012712	-12.3522
Hawaii	Italy	Ireland	West_US	-0.0167598	0.00136718	-12.2587
Hawaii	West_US	Ireland	Italy	-0.00105773	0.00038977	-2.71374
Hawaii	Ireland	Japan	S.Korea	0.00101314	0.000416589	2.432
Hawaii	Japan	Ireland	S.Korea	0.000181564	0.000474109	0.382958
Hawaii	S.Korea	Ireland	Japan	-0.000831581	0.000570806	-1.45685
Hawaii	Ireland	Japan	West_US	-0.0107443	0.00117458	-9.14738
Hawaii	Japan	Ireland	West_US	-0.0112433	0.00134118	-8.3831
Hawaii	West_US	Ireland	Japan	-0.000498979	0.000455974	-1.09431
Hawaii	Ireland	S.Korea	West_US	-0.0117574	0.00115796	-10.1536
Hawaii	S.Korea	Ireland	West_US	-0.0113848	0.00131495	-8.65796
Hawaii	West_US	Ireland	S.Korea	0.000372641	0.000375594	0.992136
Hawaii	Italy	Japan	S.Korea	-2.90034e-05	0.000410097	-0.0707232
Hawaii	Japan	Italy	S.Korea	-5.35289e-05	0.000375126	-0.142696
Hawaii	S.Korea	Italy	Japan	-2.45256e-05	0.000317782	-0.0771774
Hawaii	Italy	Japan	West_US	-0.0120371	0.00127653	-9.42955
Hawaii	Japan	Italy	West_US	-0.0114784	0.00131742	-8.71275
Hawaii	West_US	Italy	Japan	0.000558754	0.000318188	1.75605
Hawaii	Italy	S.Korea	West_US	-0.0120081	0.00109278	-10.9886
Hawaii	S.Korea	Italy	West_US	-0.0105777	0.00112248	-9.42354
Hawaii	West_US	Italy	S.Korea	0.00143037	0.000354525	4.03462
Hawaii	Japan	S.Korea	West_US	-0.0114248	0.00114716	-9.95921
Hawaii	S.Korea	Japan	West_US	-0.0105532	0.00112967	-9.34186
Hawaii	West_US	Japan	S.Korea	0.00087162	0.000365519	2.38461
Ireland	Italy	Japan	S.Korea	-0.00104215	0.000305792	-3.40803
Ireland	Japan	Italy	S.Korea	0.0038911	0.000679296	5.72814
Ireland	S.Korea	Italy	Japan	0.00493325	0.000572538	8.61645
Ireland	Italy	Japan	West_US	-0.00129283	0.00026173	-4.93954
Ireland	Japan	Italy	West_US	0.0042237	0.000748712	5.64129
Ireland	West_US	Italy	Japan	0.00551653	0.000671434	8.21605
Ireland	Italy	S.Korea	West_US	-0.000250678	0.00016116	-1.55546
Ireland	S.Korea	Italy	West_US	0.00512433	0.000513217	9.98471
Ireland	West_US	Italy	S.Korea	0.005375	0.000531133	10.1199
Ireland	Japan	S.Korea	West_US	0.000332602	0.000257411	1.2921
Ireland	S.Korea	Japan	West_US	0.000191077	0.000272233	0.701888
Ireland	West_US	Japan	S.Korea	-0.000141525	0.000303299	-0.466619
Italy	Japan	S.Korea	West_US	0.00058328	0.000217056	2.68723
Italy	S.Korea	Japan	West_US	0.0014839	0.000309864	4.78888
Italy	West_US	Japan	S.Korea	0.000900623	0.00038148	2.36086
