# Supplementary material
Source: publisher figshare collection journal article supplement (https://gsajournals.figshare.com/ndownloader/files/30838336)
Supplement: Supplementary file 3 [file 30838336 › G3-2021-402773_SuppMaterials/Table S5.xlsx]

## Sheet: Sheet1
Table S5: Migrations inferred by treemix when different number of migrations (“m”) are allowed, from 1 to 10.
Tree	migration_weight	jacknife weight estimate	jacknife standard error	p-value	subtree below origin	subtree below destination
m=1	0.296766	0.27251	0.0262751	0	Brazil:0.000173784	Ireland:0.0172058
m=2	0.312721	0.280342	0.0285195	0	(East_US:0.00457294,Brazil:6.2952e-05):0.00364852	Ireland:0.0181007
m=2	0.277308	0.275638	0.050607	2.56665e-08	East_US:0.00457294	West_US:0
m=3	0.333537	0.323901	0.0233866	0	Brazil:0.000169946	Ireland:0.019918
m=3	0.0674964	0.0741588	0.0116117	8.48328e-11	Ireland:0.019918	S.Korea:0.000141369
m=3	0.209426	0.233203	0.678714	0.365575	Hawaii:0.0701559	West_US:0.0051472
m=4	0.285467	0.276953	0.0274999	0	Brazil:0.00167831	Ireland:0.0167797
m=4	0.118231	0.117188	0.0393923	0.00146545	Hawaii:0.0696782	West_US:0.00438762
m=4	0.075847	0.0809954	0.0119384	5.82723e-12	Ireland:0.0167797	S.Korea:0
m=4	0.155911	0.139708	0.0483476	0.00192836	((Japan:0.0237846,((Hawaii:0.0696782,((East_US:0.00313408,Brazil:0.00167831):0.00355703,West_US:0.00438762):0.00118857):0.0027907,S.Korea:0):0.00136703):0.00172786,(Italy:0.000438058,Ireland:0.0167797):0.00587852):0.00597035	Brazil:0.00167831
m=5	0.292093	0.298929	0.0255162	0	Brazil:0.00112081	Ireland:0.0172565
m=5	0.454446	0.477886	0.231712	0.0195843	Hawaii:0.0694903	West_US:0.00384964
m=5	0.0817189	0.0730319	0.0112051	3.56856e-11	Ireland:0.0172565	S.Korea:0
m=5	0.106451	0.137146	0.0453316	0.00124151	(D.bia:0.014599,D.sub:0.014489):0.00895118	Brazil:0.00112081
m=5	0.0314652	0.0289444	0.0270651	0.142437	D.bia:0.014599	(West_US:0.00384964,(Brazil:0.00112081,East_US:0.00357469):0.00245278):0.00236334
m=6	0.246231	0.252666	0.0272282	0	East_US:0.00403761	Ireland:0.0150422
m=6	0.413166	0.410417	0.0686122	1.1042e-09	Hawaii:0.0695081	West_US:0.00470733
m=6	0.0845423	0.0806707	0.0113767	6.66356e-13	Ireland:0.0150422	S.Korea:0.00124219
m=6	0.0541161	0.0629169	0.016576	7.3623e-05	Ireland:0.0150422	Brazil:0.000563062
m=6	0.207737	0.230886	0.0357749	5.45121e-11	West_US:0.00470733	S.Korea:0.00124219
m=6	0.0271752	0.0403478	0.0600489	0.250819	D.bia:0.0146341	((East_US:0.00403761,Brazil:0.000563062):0.00201008,West_US:0.00470733):0.00246081
m=7	0.333115	0.323825	0.0280498	0	Brazil:0.000826952	Ireland:0.0198056
m=7	0.145857	0.070386	0.0247068	0.00219392	Hawaii:0.0666323	West_US:0
m=7	0.146885	0.133917	0.0418192	0.000681716	Ireland:0.0198056	S.Korea:0.00174526
m=7	0.453759	0.445505	0.0328701	0	(Ireland:0.0198056,Italy:6.88702e-06):0.00690903	(East_US:0.00507672,Brazil:0.000826952):0.0145046
m=7	0.148842	0.185799	0.112889	0.0498966	(East_US:0.00507672,Brazil:0.000826952):0.0145046	East_US:0.00507672
m=7	0.201127	0.214508	0.0306419	1.27554e-12	(East_US:0.00507672,Brazil:0.000826952):0.0145046	S.Korea:0.00174526
m=7	0.0160866	0.0126802	0.0287067	0.329347	Hawaii:0.0666323	(Ireland:0.0198056,Italy:6.88702e-06):0.00690903
m=8	0.319015	0.299101	0.0284814	0	Brazil:0.000966008	Ireland:0.0191195
m=8	0.122379	0.120218	0.0285353	1.26027e-05	Hawaii:0.0686285	West_US:0.00481704
m=8	0.11192	0.108259	0.019742	2.08269e-08	Ireland:0.0191195	S.Korea:0.00220592
m=8	0.094508	0.0975112	0.0429522	0.011597	(Ireland:0.0191195,Italy:0):0.00570981	Brazil:0.000966008
m=8	0.139693	0.121168	0.0278738	6.9002e-06	(S.Korea:0.00220592,Japan:0.0229452):0.00362827	D.bia:0.0218495
m=8	0.0828065	0.0674436	0.0258552	0.0045468	D.bia:0.0218495	(West_US:0.00481704,(Brazil:0.000966008,East_US:0.00365747):0.00298658):0.00282355
m=8	0.313172	0.304801	0.0331363	0	West_US:0.00481704	S.Korea:0.00220592
m=8	0.253513	0.159193	0.14692	0.139285	West_US:0.00481704	(S.Korea:0.00220592,Japan:0.0229452):0.00362827
m=9	0.277789	0.266366	0.0259266	0	Brazil:0.00238688	Ireland:0.0164497
m=9	0.143677	0.101424	0.0190405	4.99941e-08	Ireland:0.0164497	S.Korea:0.0106246
m=9	0.163798	0.163986	0.0383399	9.46429e-06	(Ireland:0.0164497,Italy:0.00048205):0.00557117	Brazil:0.00238688
m=9	0.294772	0.165086	0.0831763	0.0235847	(Brazil:0.00238688,East_US:0.00255495):0.00314231	West_US:0.0151654
m=9	0.562771	0.46814	0.0923428	1.99338e-07	Japan:0.0234493	S.Korea:0.0106246
m=9	0.316946	0.210288	0.0433496	6.14291e-07	S.Korea:0.0106246	West_US:0.0151654
m=9	0.0350172	0.0165184	0.0195648	0.199254	West_US:0.0151654	Brazil:0.00238688
m=9	0.0883628	0.0435073	0.0525047	0.203655	D.bia:0.0145664	(S.Korea:0.0106246,(Brazil:0.00238688,East_US:0.00255495):0.00314231):0.00402942
m=9	0.0487937	0.0145042	0.0795006	0.427618	Japan:0.0234493	West_US:0.0151654
m=10	0.263541	0.287426	0.0268884	0	Brazil:0.00138316	Ireland:0.0151891
m=10	0.121551	0.143991	0.047695	0.00126808	Hawaii:0.069967	West_US:0.00510925
m=10	0.147366	0.157305	0.0198831	1.22125e-15	Ireland:0.0151891	S.Korea:0.00296747
m=10	0.14224	0.129176	0.0438743	0.00161883	(Ireland:0.0151891,Italy:0.0011255):0.00593528	Brazil:0.00138316
m=10	0.020207	0.0162806	0.0045014	0.000149145	Hawaii:0.069967	Italy:0.0011255
m=10	0.018236	0.0177108	0.00637756	0.00274273	Hawaii:0.069967	Japan:0.0230619
m=10	0.022755	0.0206438	0.00711092	0.00184736	Japan:0.0230619	West_US:0.00510925
m=10	0.343181	0.324625	0.0313278	0	West_US:0.00510925	S.Korea:0.00296747
m=10	0.00695373	0.0069179	0.00575291	0.114584	Hawaii:0.069967	S.Korea:0.00296747
m=10	0.0165469	0.0120656	0.0113292	0.143437	D.bia:0.014557	(West_US:0.00510925,(Brazil:0.00138316,East_US:0.00331024):0.0030633):0.00115502
